# Supplementary material for: The synthesis and application of a diazirine-modified uridine analogue for investigating RNA–protein interactions
Source: Royal Society of Chemistry journal article supplement (doi:10.1039/c4ra08682a), 2014-01-01
Supplement: c4ra08682a1.pdf [file c4ra08682a1.pdf]

## Supporting Information

### **The Synthesis and Application of a Diazirine-modified Uridine Analogue for Identifying RNA-Protein Interactions**

Christine C. Smith, Marcel Hollenstein\*, and Christian J. Leumann\*

Department of Chemistry and Biochemistry, University of Bern, Freiestrasse 3, CH-3012 Bern, Switzerland.

Email: [leumann@dcb.unibe.ch](mailto:leumann@dcb.unibe.ch) and [hollenstein@dcb.unibe.ch](mailto:hollenstein@dcb.unibe.ch)

#### Table of Contents:

|                                               |         |
|-----------------------------------------------|---------|
| 1. General procedures                         | S2-S3   |
| 2. Synthetic procedures and characterizations | S4-S44  |
| 3. Oligonucleotide synthesis                  | S45     |
| 4. Crosslinking and transcription assays      | S46-S48 |
| 5. Additional gels                            | S49-S50 |
| 6. Cited references                           | S51     |

## 1. General procedures:

All reagents were purchased from Sigma Aldrich, Fluka, Acros, Apollo Scientific or ABCR at the highest quality available. All anhydrous reactions were performed under Ar and in dried glassware. Anhydrous solvents were obtained by filtration through activated alumina (THF, CH<sub>2</sub>Cl<sub>2</sub>, MeCN, Et<sub>2</sub>O) or purchased in crown capped bottles (pyridine, dioxane, and DMF). 5'-*O*-(4,4'-dimethoxytrityl)-5-iodouridine (**3**) was synthesized following a literature procedure.<sup>1</sup>

Column chromatography was performed on silica gel (Silicycle) with an average particle size of 40 µm. All solvents for column chromatography were of technical grade and distilled prior to use. Thin-layer chromatography (TLC) was performed on silica gel plates (Macherey–Nagel, 0.25 mm, UV<sub>254</sub>). Visualisation was achieved under UV light and/or by dipping in staining solution: Cerium (IV) sulfate (2.1 g), phosphomolybdic acid (4.2 g), conc. H<sub>2</sub>SO<sub>4</sub> (2.5 mL), H<sub>2</sub>O (180 mL); or KMnO<sub>4</sub> (1.5 g), K<sub>2</sub>CO<sub>3</sub> (10.0 g), 10% NaOH (1.25 mL), H<sub>2</sub>O (200 mL) followed by heating with a heat gun.

NMR spectra were recorded on a Bruker DRX 400 or a Bruker AC 300 spectrometer (400 or 300 MHz for <sup>1</sup>H, 101 or 75.5 MHz for <sup>13</sup>C, 121.4 MHz for <sup>31</sup>P, and 376.5 MHz for <sup>19</sup>F) in CDCl<sub>3</sub>, CD<sub>3</sub>OD or D<sub>2</sub>O at ambient temperature and all spectra were referenced to the signals of the corresponding solvent. . Chemical shifts are given in ppm (δ scale) and coupling constants (*J*) in Hz. Signal assignments are based on DEPT and on <sup>1</sup>H–<sup>1</sup>H and <sup>1</sup>H–<sup>13</sup>C correlation experiments (COSY/HSQC). Data are reported as follows: chemical shifts, multiplicity (s = singlet, d = doublet, t = triplet, q = quartet, m = multiplet), integration, and coupling constants (*J* in Hz).

High resolution electrospray ionisation (ESI) mass spectra (MS, *m/z*) were recorded on an Applied Biosystems Sciex QSTAR Pulsar or Thermo Scientific LTQ Orbitrap XL instrument. Where ESI was unsuitable to detect the desired mass, matrix-assisted laser desorption/ionisation (MALDI-TOF) was applied using Bruker Daltonics Autoflex III instrument with a smartbeam Nd:YAG-laser (355 nm).

HPLC was performed on either an Äkta purifier (GE-Healthcare) or an Äkta basic 10/100 (Amersham Pharmacia Biotech System) on either a diethylaminoethyl (DEAE)-HPLC anion exchange column (DNAPAC PA200, 4 x 250 mm analytical column, with pre-column both

from Dionex) or semi-preparative Phenomenex Jupiter semi-preparative reversed phase (RP)-HPLC column (5 $\mu$  C18 300Å) column.

UV-melting curves were recorded on a Varian Cary 100 Bio UV–VIS spectrophotometer. Absorbance was monitored at 260 nm and the heating rate was set to 0.5°C min<sup>-1</sup>. A cooling–heating–cooling cycle in the temperature range 15–80°C was applied.  $T_m$  values were obtained from the maximum of the first derivative curves using the Varian WinUV software and reported as the average of at least three ramps (standard deviation reported as error). To avoid evaporation of the solution, the sample solutions were covered with a layer of dimethylpolysiloxane. All measurements were carried out in NaCl (150 mM)/NaH<sub>2</sub>PO<sub>4</sub> (10 mM) pH 7 buffer with duplex concentration of 1  $\mu$ M. The absorbance values were converted to hyperchromicity and normalized before plotting.

T7 RNA polymerase was purchased from either Promega or New England Biolabs. Single-stranded DNA binding protein (SSB) and RNasin<sup>®</sup> were purchased from Promega. Natural NTPs were purchased from Invitrogen. Thermostable inorganic pyrophosphatase (TIPP), 100 mM MgSO<sub>4</sub> solution, Trypsin and T4 RNA ligase were purchased from New England Biolabs. All enzymes and proteins were used in the buffers supplied by the manufacturers and according to manufacturer's instructions. 5'-<sup>32</sup>P–cytidine-3',5'-bisphosphate (pCp) and  $\alpha$ -<sup>32</sup>P-adenosine 5'-triphosphate ( $\alpha$ -<sup>32</sup>P-ATP) were purchased from Hartmann analytic. Crosslinking was achieved by irradiation with Lumos 43 (Atlas Photonics) at 375 nm. Streptavidin coated magnetic beads were obtained from New England Biolabs. Fluorescence was detected with FLA-3000 phosphorimager (Fujifilm). Radioactivity was detected using a Storm 820 phosphorimager with the ImageQuant software (both from GE Healthcare) or ImageJ software (National Institutes of Health).

## 2. Synthetic procedures and characterizations:

### ((4-bromobenzyl)oxy)(*tert*-butyl)dimethylsilane (**S1**)

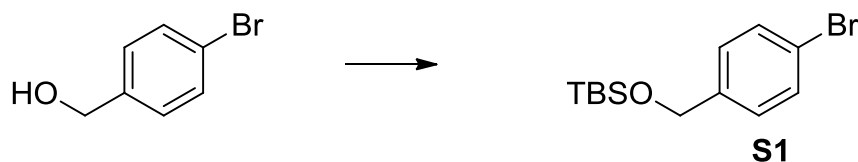

To a stirring solution of 4-bromobenzylalcohol (5.00 g, 26.7 mmol) in DMF (10 mL) was added imidazole (5.46 g, 80.2 mmol) and TBDMS-Cl (6.02 g, 40.1 mmol) and was stirred at room temperature for 15 hours. The reaction mixture was then diluted with distilled water (50 mL), transferred to a separating funnel and extracted with diethyl ether (2x 150 mL). The organic extracts were combined, washed with brine, dried over  $\text{MgSO}_4$ , filtered to remove the drying agent and reduced to dryness *in vacuo*. The residue was dissolved in hexanes and purified by column chromatography (0-50% EtOAc in hexanes) to yield 7.58 g (95%) of compound **S1** as a colorless liquid.

Analytical data for compound **S1**

TLC ( $\text{CH}_2\text{Cl}_2$ )  $R_f = 0.70$

$^1\text{H}$  NMR (300 MHz,  $\text{CDCl}_3$ )  $\delta$  7.44 (d,  $J = 8.4$  Hz, 2H, H-arom.), 7.19 (d,  $J = 8.5$  Hz, 2H, H-arom.), 4.68 (s, 2H, CH<sub>2</sub>), 0.94 (s, 9H, CH<sub>3</sub>-*t*-butyl-Si), 0.09 (s, 6H, CH<sub>3</sub>-Si).

$^{13}\text{C}$  NMR (75 MHz,  $\text{CDCl}_3$ )  $\delta$  140.7, 131.5, 127.9, 120.8, 64.5, 26.1, 18.6, -5.1.

MALDI-TOF<sup>+</sup>MS calculated for  $\text{C}_{13}\text{H}_{21}\text{BrOSi}$  ( $[\text{M}+\text{H}]^+$ ): 301.0623, found: 300.835.

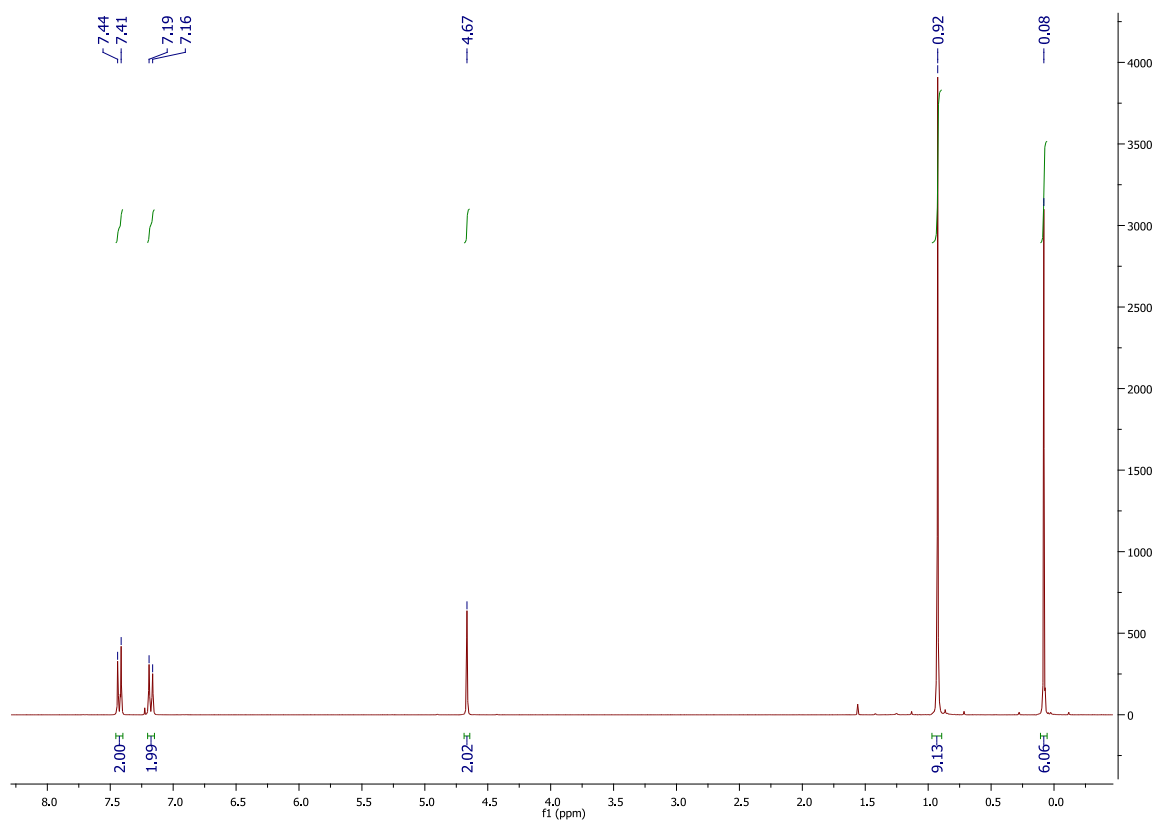

**Figure S1.** <sup>1</sup>H NMR of compound S1

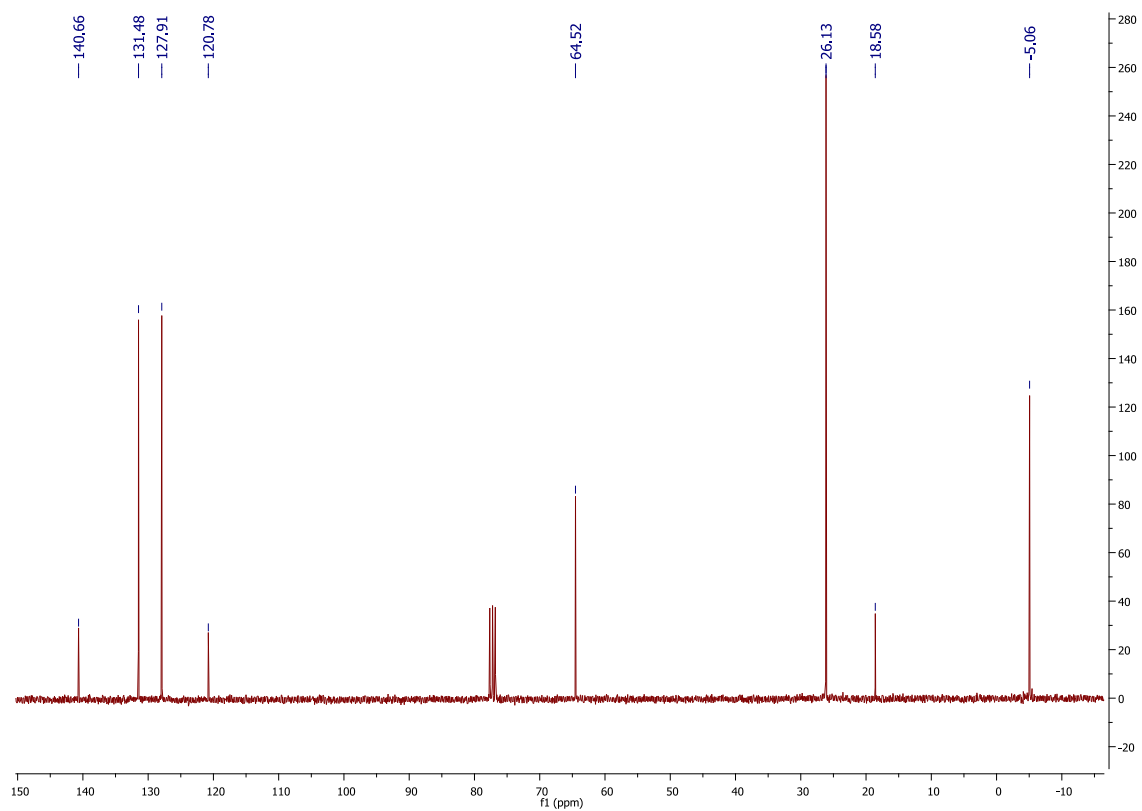

**Figure S2.** <sup>13</sup>C NMR of compound S1

***N,N*-diethyl-2,2,2-trifluoroacetamide<sup>2</sup> (S2)**

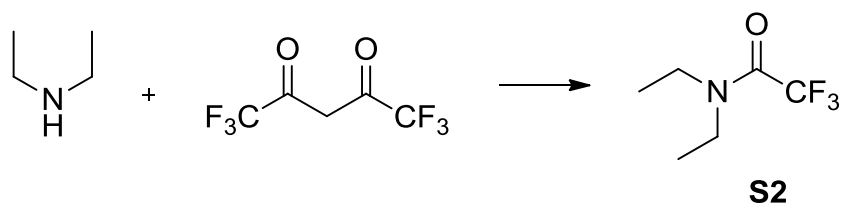

Diethylamine (24.7 mL, 238.1 mmol) was dissolved in Et<sub>2</sub>O (100 mL) and cooled to -78°C. Trifluoroacetic anhydride (16.8 mL, 119.1 mmol) was added dropwise over 1 hour (temperature was maintained below -50°C). The reaction mixture was stirred for 10 minutes and then warmed to room temperature slowly. The reaction mixture was diluted with distilled water (25 mL) and separated repeatedly until the aqueous layer was neutral. The organic layer was then dried over MgSO<sub>4</sub>, filtered, and reduced to dryness *in vacuo* to yield 18.1 g (93%) of compound **S2** as a colorless liquid. Carried through to the next step without further purification.

**Analytical data for compound **S2****

<sup>1</sup>H NMR (300 MHz, CDCl<sub>3</sub>) δ 3.45 – 3.33 (dd, 4H, CH<sub>2</sub>), 1.16 (dt, *J* = 10.3, 7.1 Hz, 6H, CH<sub>3</sub>).

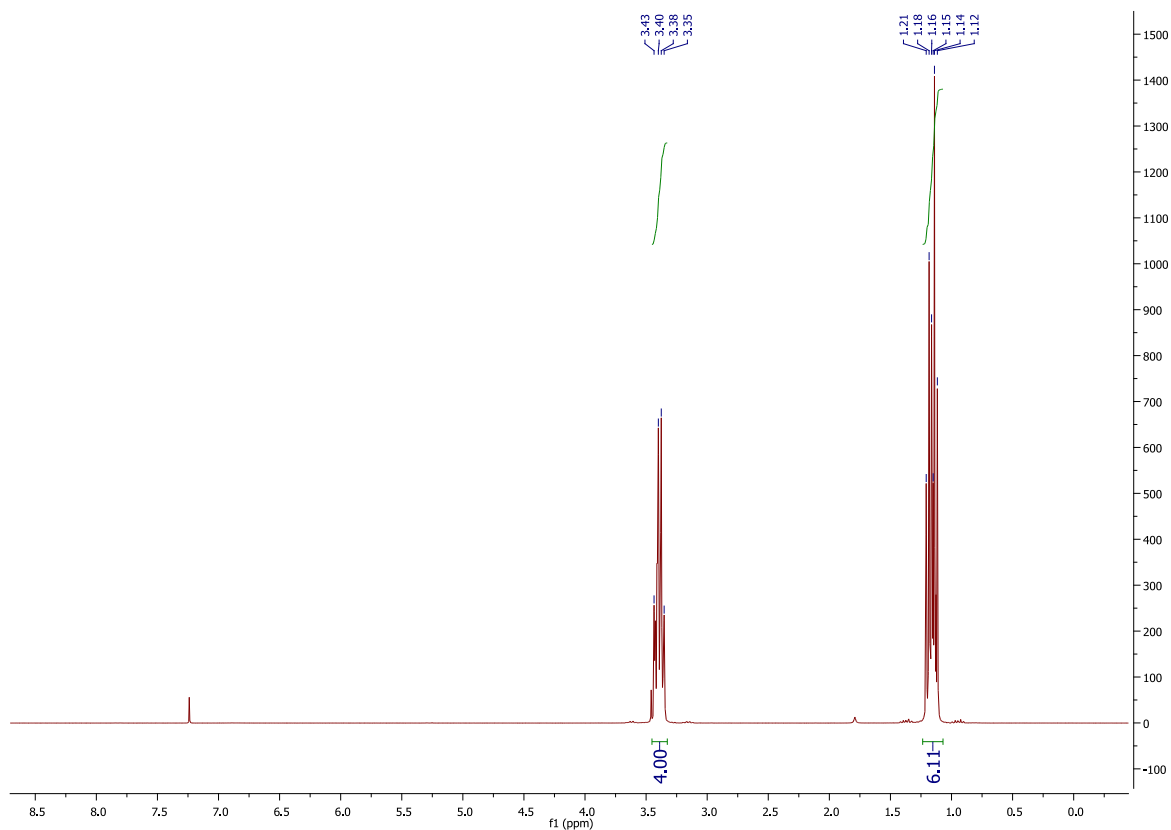

**Figure S3.**  $^1\text{H}$  NMR of compound **S2**.

**1-(4-(((*tert*-butyldimethylsilyl)oxy)methyl)phenyl)-2,2,2-trifluoroethanone<sup>3</sup> (**S3**)**

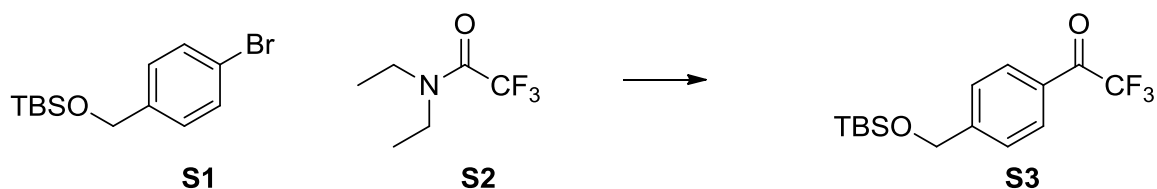

To a stirring solution of compound **S1** (8.00 g, 26.7 mmol) in dry THF (150 mL) at  $-78^\circ\text{C}$  under Ar in flame dried glassware was added *n*-BuLi (20 mL, 1.6 M in hexanes, 32.0 mmol) dropwise over 15 minutes. The resulting mixture was stirred at  $-78^\circ\text{C}$  for 2 hours. Compound **S2** (7.00 mL, 40.1 mmol) was dissolved in dry THF (18 mL) and the resulting solution was added to the reaction mixture dropwise over 15 minutes. The reaction mixture was maintained at  $-78^\circ\text{C}$  for a further 2 hours. 10%  $\text{NH}_4\text{Cl}$  solution (60 mL) was then added and the reaction mixture was allowed to warm slowly to room temperature before dilution with  $\text{Et}_2\text{O}$  (200 mL). The organic phase was washed with further 10%  $\text{NH}_4\text{Cl}$  solution (2x 30 mL) and brine (50 mL). The organic layer was then dried over  $\text{MgSO}_4$ , filtered and reduced to

dryness *in vacuo*. The residue was dissolved in hexanes/EtOAc 9:1 and purified by column chromatography (hexanes/EtOAc 9:1) to yield 7.55 g (89%) of compound **S3** as a colorless liquid.

Analytical data for compound **S3**

TLC (CH<sub>2</sub>Cl<sub>2</sub>)  $R_f$  = 0.73

<sup>1</sup>H NMR (300 MHz, CDCl<sub>3</sub>)  $\delta$  8.04 (d,  $J$  = 7.7 Hz, 2H, H-arom.), 7.49 (d,  $J$  = 8.7 Hz, 2H, H-arom.), 4.82 (s, 2H, CH<sub>2</sub>), 0.94 (s, 9H, CH<sub>3</sub>-*t*-butyl-Si), 0.11 (s, 6H, CH<sub>3</sub>-Si).

<sup>13</sup>C NMR (75 MHz, CDCl<sub>3</sub>)  $\delta$  180.2 (d,  $J$  = 34.9 Hz, CO<sub>2</sub>CF<sub>3</sub>), 150.3, 130.5, 130.4, 128.8, 127.9, 126.4, 117.0 (d,  $J$  = 291.4 Hz), 64.5, 26.2-26.1, 18.6, -5.2.

<sup>19</sup>F NMR (376 MHz, CDCl<sub>3</sub>)  $\delta$  -71.4.

ESI<sup>+</sup>-HRMS calculated for C<sub>15</sub>H<sub>21</sub>F<sub>3</sub>O<sub>2</sub>Si ([M+H]<sup>+</sup>): 319.1336, found: 319.1331.



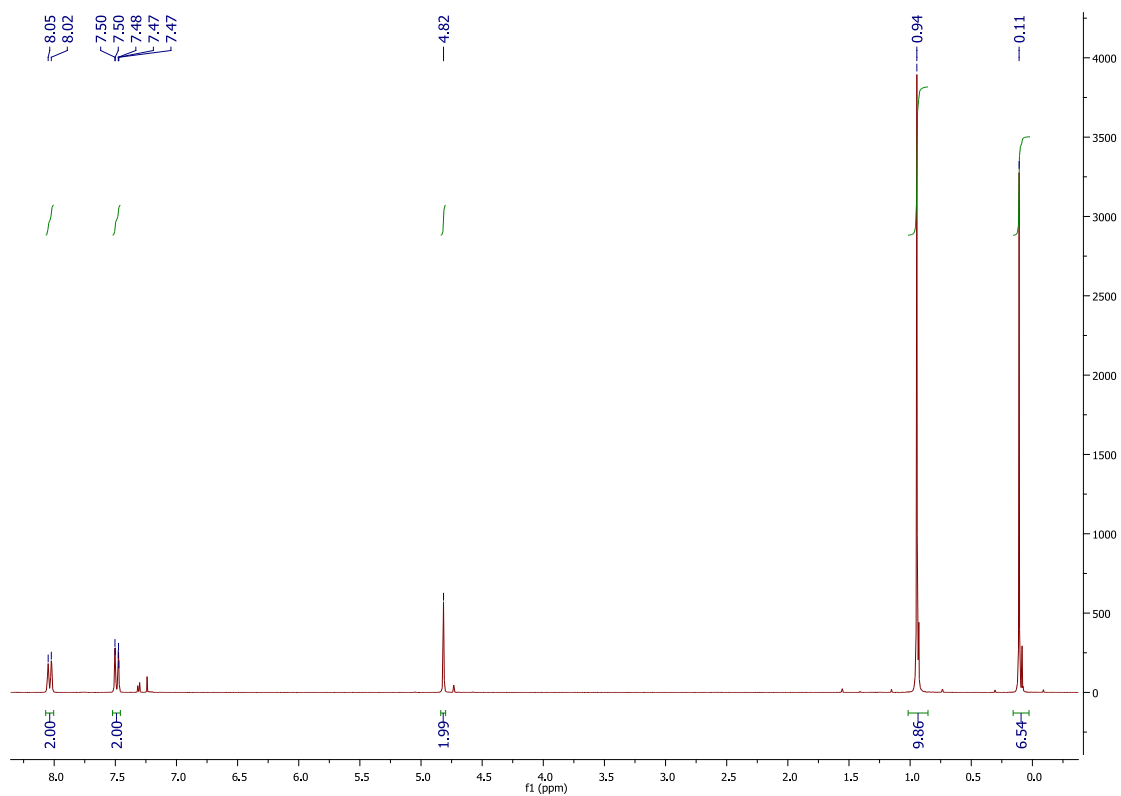

**Figure S4.** <sup>1</sup>H NMR of compound S3.

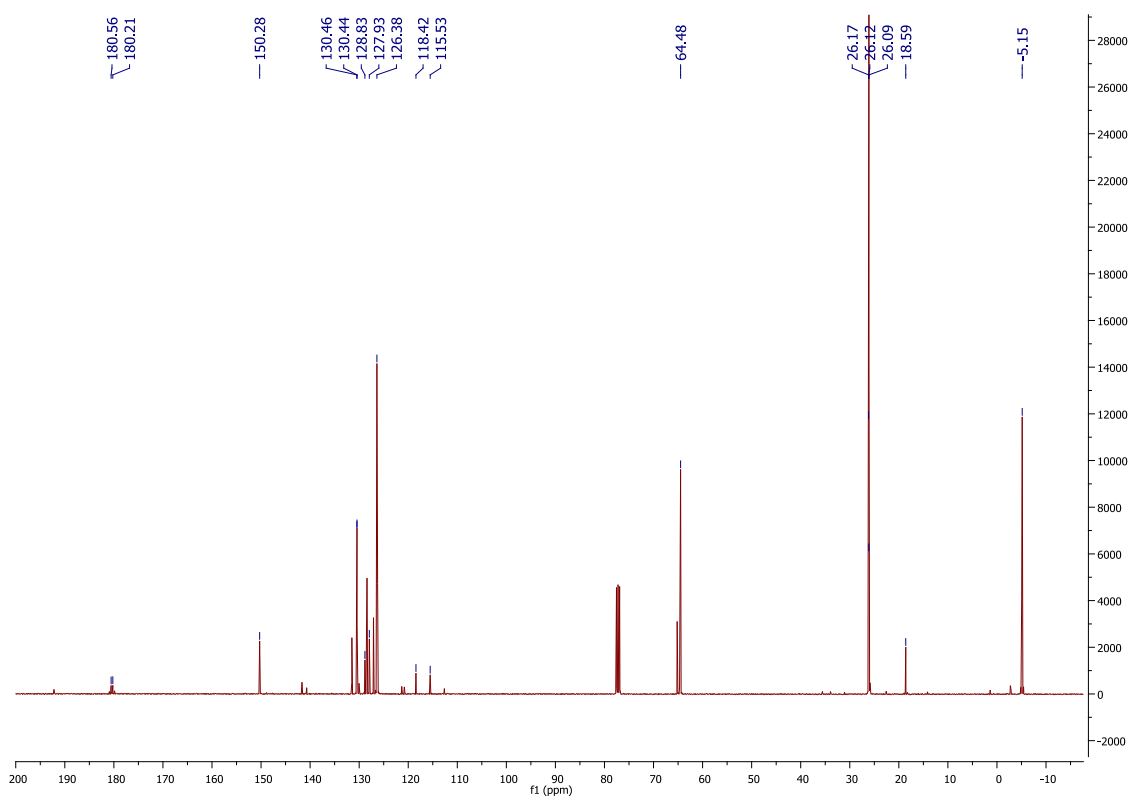

**Figure S5.** <sup>13</sup>C NMR of compound S3.

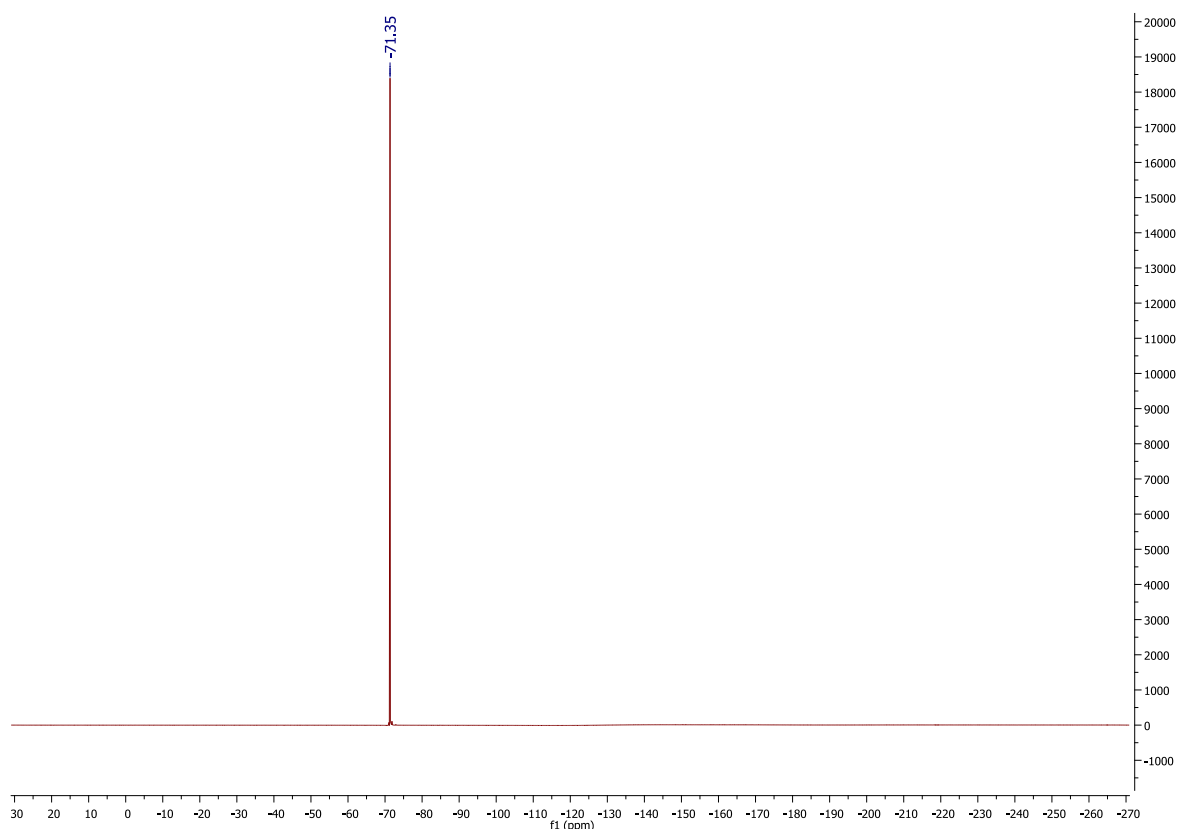

**Figure S6.**  $^{19}\text{F}$  NMR of compound **S3**.

**1-(4-(((*tert*-butyldimethylsilyl)oxy)methyl)phenyl)-2,2,2-trifluoroethanone oxime (**S4**)**

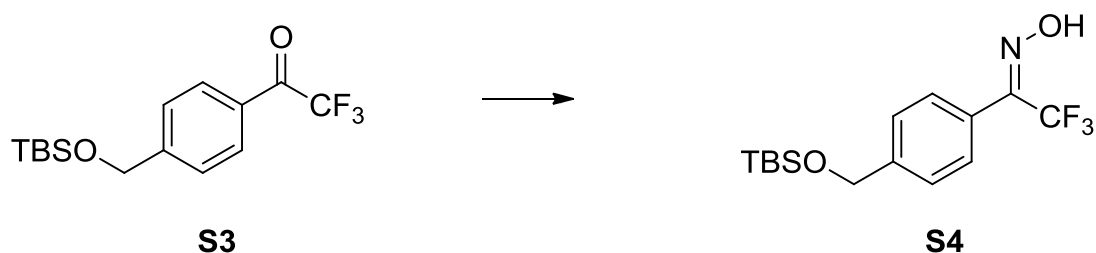

To a stirring solution of compound **S3** (7.55 g, 23.7 mmol) in EtOH (40 mL) was added dry pyridine (65 mL) and hydroxylamine hydrochloride (1.82 g, 26.1 mmol). The resulting mixture was heated to 60°C for 3 hours. The reaction mixture was then diluted with Et<sub>2</sub>O (150 mL) and washed with distilled H<sub>2</sub>O (2x 30 mL) and brine (50 mL). The organic layer was then dried over MgSO<sub>4</sub>, filtered and reduced to dryness *in vacuo* to yield 6.98 g (88%) of compound **S4** as a colorless liquid. Carried through to the next step without further purification.

TLC (CH<sub>2</sub>Cl<sub>2</sub>)  $R_f$  = 0.40 and 0.34 for each isomer of the product. The ratio of both *E* and *Z* isomers was estimated to be 1:1 by TLC.

**1-(4-(((*tert*-butyldimethylsilyl)oxy)methyl)phenyl)-2,2,2-trifluoroethanone *O*-tosyl oxime (S5)**

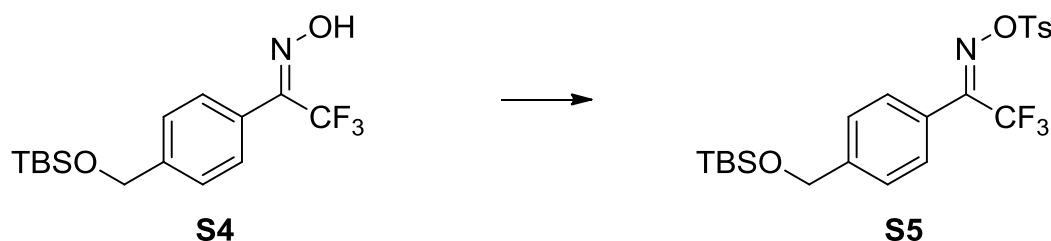

To a stirring solution of compound **S4** (6.98 g, 21.0 mmol) in dry pyridine (40 mL) was added *p*-toluenesulfonyl chloride (5.59 g, 29.4 mmol) at room temperature. The reaction mixture was stirred under Ar for 72 hours. TLC analysis showed remaining starting material, so a further 0.25 equivalents of *p*-toluenesulfonyl chloride (1.00 g, 5.2 mmol) were added and stirred for a further hour. The reaction mixture was diluted with Et<sub>2</sub>O (150 mL) and washed with distilled H<sub>2</sub>O (2x 50 mL), brine (50 mL), dried over MgSO<sub>4</sub>, filtered and reduced to dryness *in vacuo*. The residue was dissolved in CH<sub>2</sub>Cl<sub>2</sub>/hexanes 1:1 and purified by column chromatography (33-50% CH<sub>2</sub>Cl<sub>2</sub> in hexanes) and reduced to dryness *in vacuo* to yield 4.10 g (40%) of compound **S5** as a colorless liquid.

Analytical data for compound **S5**

TLC (CH<sub>2</sub>Cl<sub>2</sub>/hexanes 1:2)  $R_f$  = 0.41

<sup>1</sup>H NMR (300 MHz, CDCl<sub>3</sub>) δ 7.87 (d, *J* = 8.3 Hz, 2H, H-arom.), 7.38 (t, *J* = 7.3 Hz, 6H, H-arom.), 4.76 (s, 2H, CH<sub>2</sub>), 2.46 (s, 3H, CH<sub>3</sub>-*p*-tosyl), 0.94 (s, 9H, CH<sub>3</sub>-*t*-butyl-Si), 0.11, 0.10 (s, 3H, CH<sub>3</sub>-Si).

<sup>13</sup>C NMR (75 MHz, CDCl<sub>3</sub>) δ 154.4, 154.0, 146.3, 145.8, 131.5, 130.1, 129.5, 129.4, 129.0, 128.7, 126.2, 123.2, 119.9 (d, *J* = 277.7 Hz), 64.5, 26.1, 22.0, 18.6, -5.1.

<sup>19</sup>F NMR (376 MHz, CDCl<sub>3</sub>) δ -71.4.

ESI<sup>+</sup>-HRMS calculated for C<sub>22</sub>H<sub>28</sub>F<sub>3</sub>NO<sub>4</sub>SSi ([M+H]<sup>+</sup>): 488.1533, found: 488.1534.

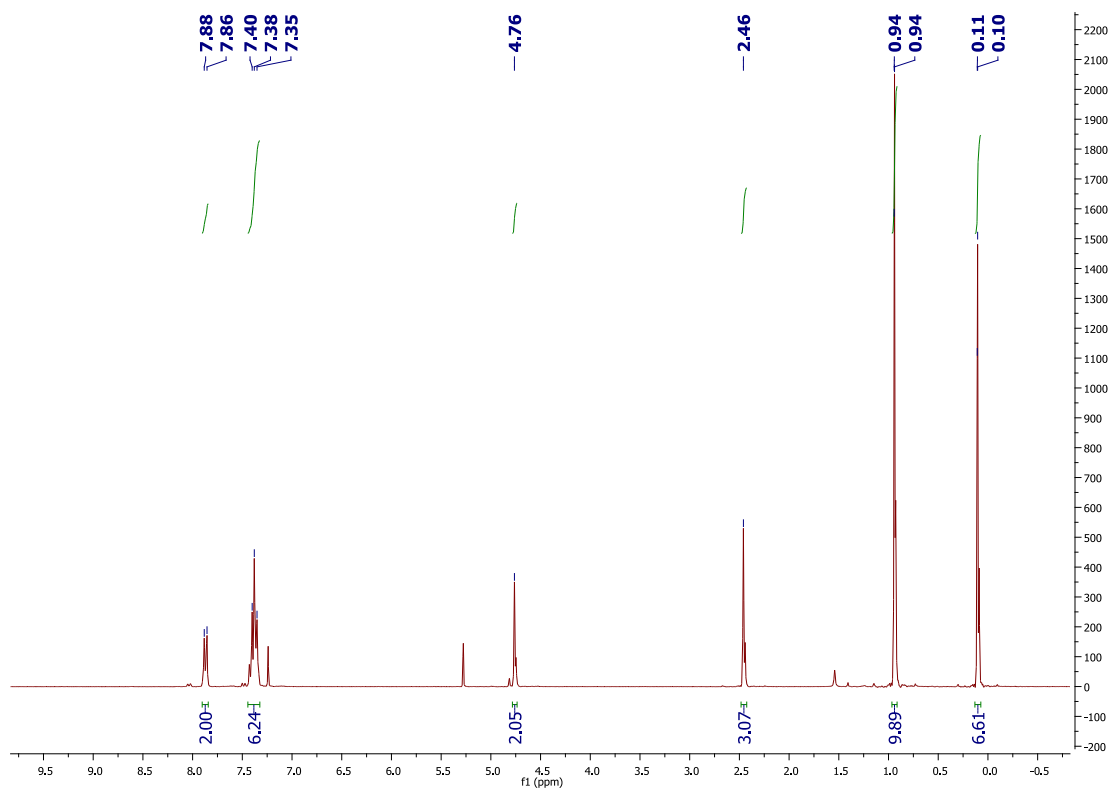

**Figure S7.** <sup>1</sup>H NMR of compound S5.

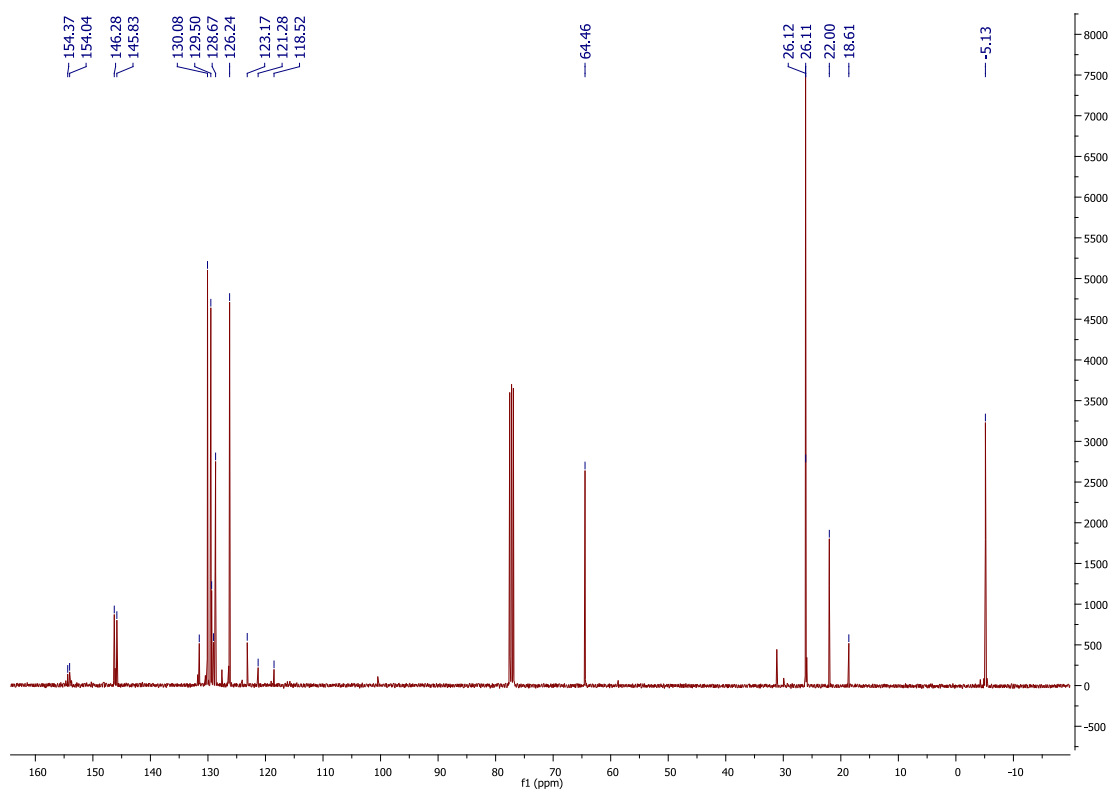

**Figure S8.** <sup>13</sup>C NMR of compound S5.

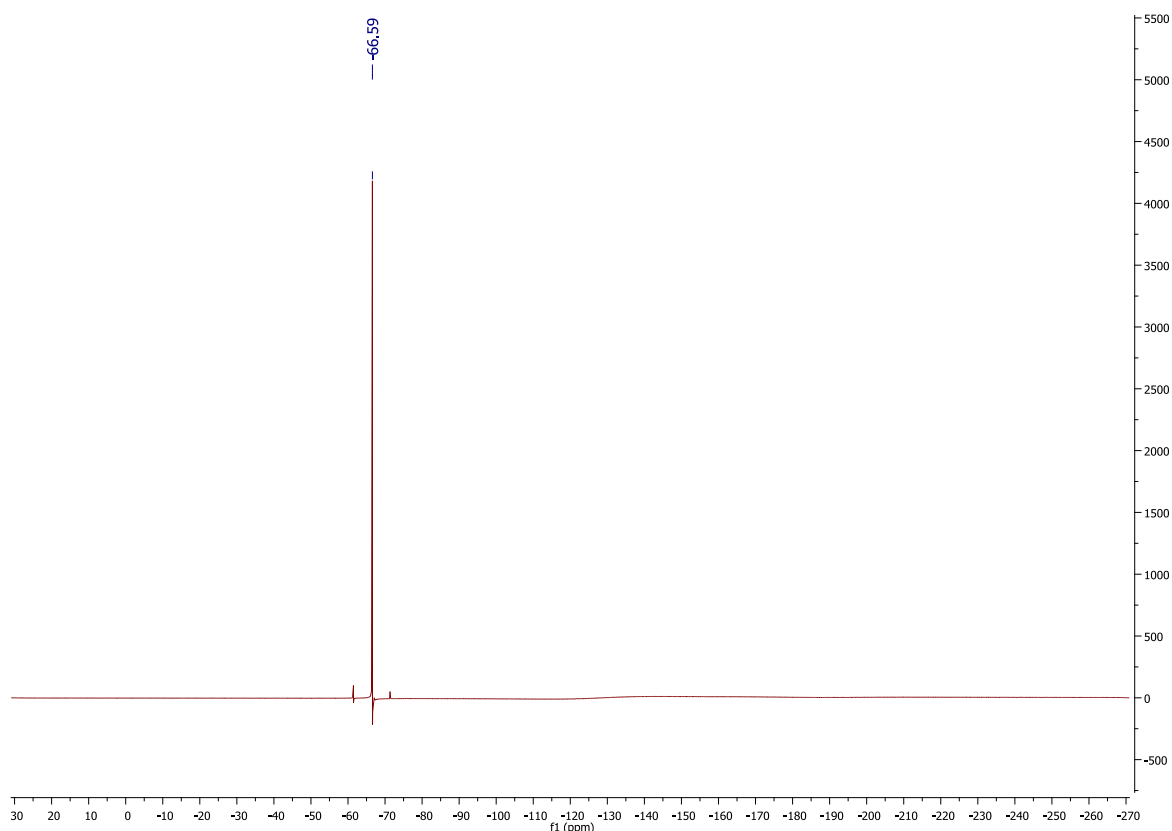

**Figure S9.**  $^{19}\text{F}$  NMR of compound **S5**.

**3-(4-(((*tert*-butyldimethylsilyl)oxy)methyl)phenyl)-3-(trifluoromethyl)diaziridine (**S6**)**

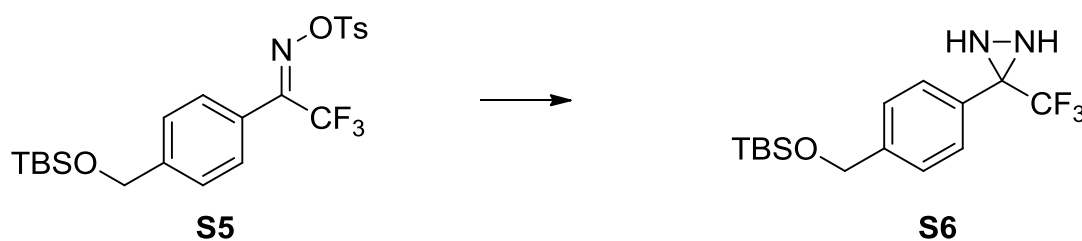

$\text{NH}_3$  gas was condensed by streaming the gas into a two-necked round-bottom flask submerged in dry ice/acetone, fitted with a cold-finger filled with dry ice/acetone and with a  $\text{CaCl}_2$  drying tube.

To a solution of compound **S5** (2.99 g, 6.1 mmol) in dry  $\text{Et}_2\text{O}$  (15 mL) at  $-78^\circ\text{C}$  in a high pressure reaction vessel was added liquid ammonia gas (20 mL) and sealed. The reaction vessel was allowed to warm to room temperature overnight before re-cooling to  $-78^\circ\text{C}$  to allow safe removal of the lid. The excess ammonia evaporated upon warming to room temperature and the resulting liquid was filtered to remove the white precipitate, which was

washed with further Et<sub>2</sub>O (2x 40 mL). The filtrate was reduced to dryness *in vacuo* to yield 1.93 g (95%) of compound **S6** as a colorless liquid.

Analytical data for compound **S6**

TLC (hexanes/EtOAc 9:1)  $R_f = 0.54$

<sup>1</sup>H NMR (300 MHz, CDCl<sub>3</sub>) δ 7.56 (d,  $J = 8.1$  Hz, 2H, H-arom.), 7.36 (d,  $J = 8.5$  Hz, 2H, H-arom.), 4.74 (s, 2H, CH<sub>2</sub>), 2.76 (d,  $J = 8.5$  Hz, 1H, NH), 2.19 (d,  $J = 8.7$  Hz, 1H) NH, 0.93 (s, 9H, CH<sub>3</sub>-*t*-butyl-Si), 0.09 (s, 6H, CH<sub>3</sub>-Si).

<sup>13</sup>C NMR (75 MHz, CDCl<sub>3</sub>) δ 144.0, 130.4, 128.2, 126.4, 123.8 (d,  $J = 278.1$  Hz), 117.7, 64.6, 26.1, 18.6, -5.1.

<sup>19</sup>F NMR (376 MHz, CDCl<sub>3</sub>) δ -75.6.

ESI<sup>+</sup>-HRMS calculated for C<sub>15</sub>H<sub>23</sub>F<sub>3</sub>N<sub>2</sub>OSi ([M+H]<sup>+</sup>): 333.1605, found: 333.1606.

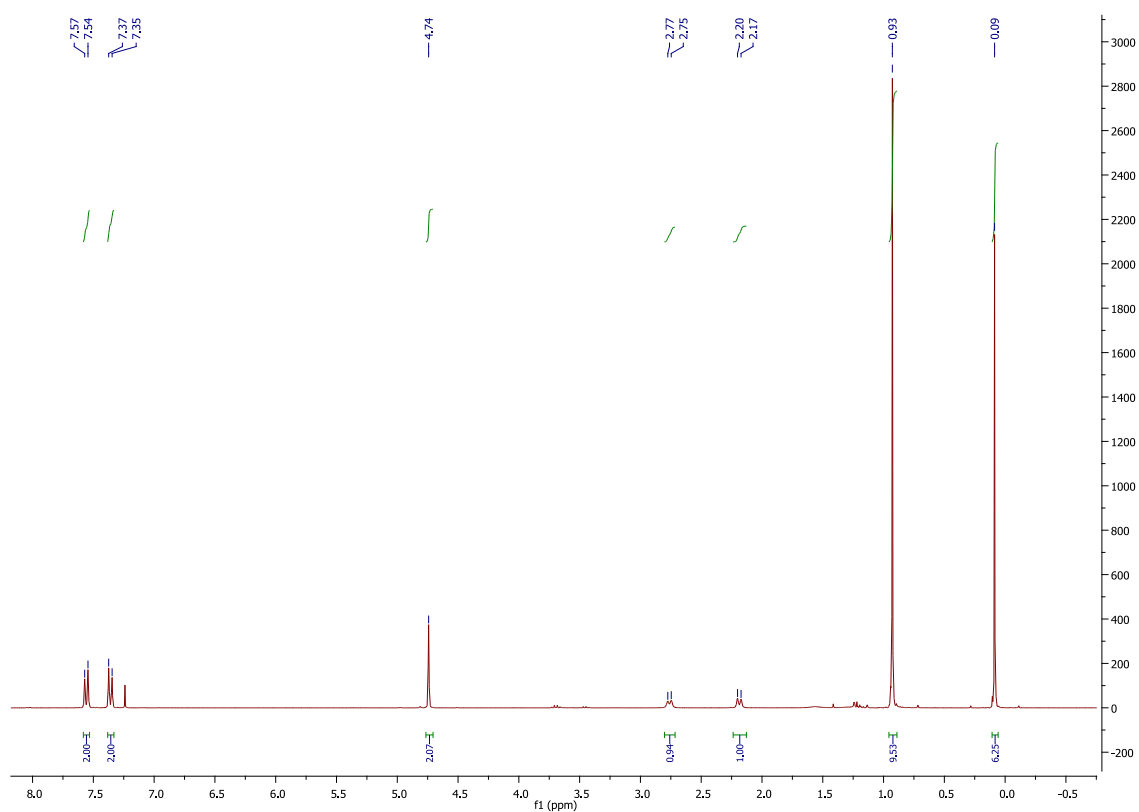

**Figure S10.** <sup>1</sup>H NMR of Compound **S6**.

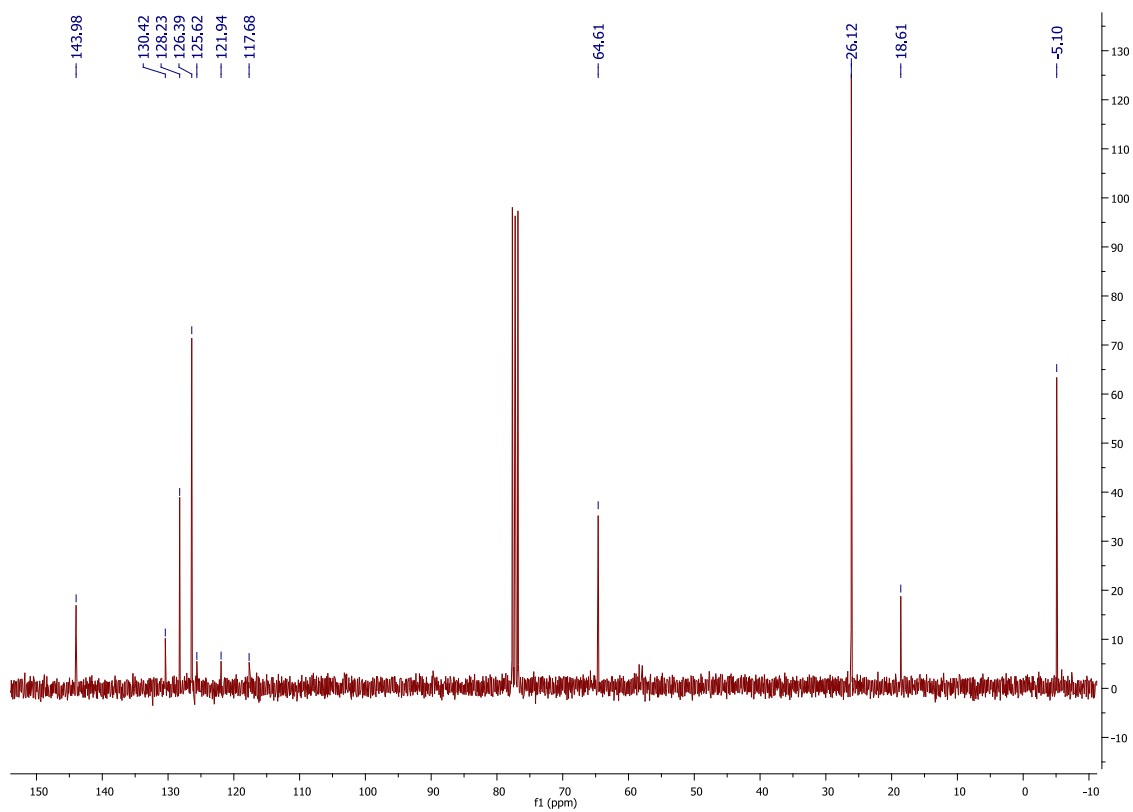

**Figure S11.** <sup>13</sup>C NMR of Compound S6.

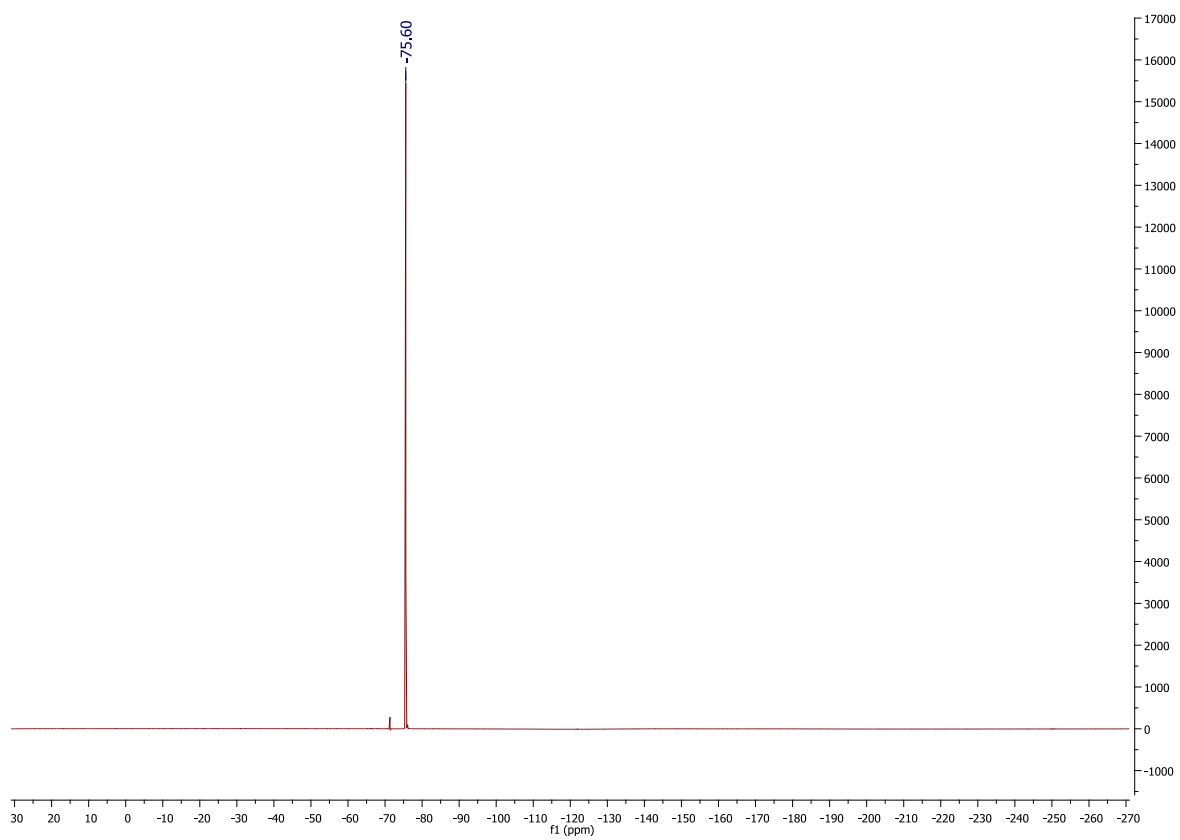

**Figure S12.** <sup>19</sup>F NMR of Compound S6.

### 3-(4-(((*tert*-butyldimethylsilyl)oxy)methyl)phenyl)-3-(trifluoromethyl)-3*H*-diazirine (**S7**)

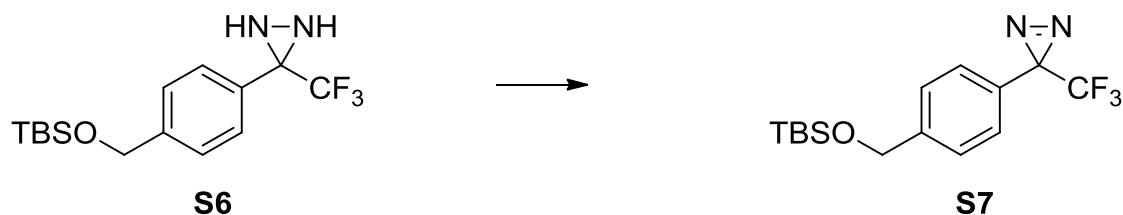

Fresh Ag<sub>2</sub>O was prepared before direct use in the reaction. To a stirring solution of AgNO<sub>3</sub> (17.00 g, 0.1 mol) in distilled H<sub>2</sub>O (100 mL) at reflux was added 1M NaOH solution (100 mL) dropwise. The brown precipitate was collected by filtration, washed with distilled H<sub>2</sub>O (3x 50 mL), acetone (5x 50 mL) and Et<sub>2</sub>O (5x 50 mL) with agitation to ensure removal of all remaining H<sub>2</sub>O. The resulting brown powder was used immediately.

To a stirring solution of compound **S6** (3.02 g, 9.1 mmol) in dry Et<sub>2</sub>O (60 mL) was added the Ag<sub>2</sub>O as described above, and was stirred at room temperature for 4 hours in the dark. The reaction mixture was then filtered over celite, washed with further Et<sub>2</sub>O (100 mL) and reduced to dryness *in vacuo* to yield 2.86 g (95%) of compound **S7** as a pale yellow liquid.

Analytical data for compound **S7**

TLC (hexanes/EtOAc 9:1) *R<sub>f</sub>* = 0.89

<sup>1</sup>H NMR (300 MHz, CDCl<sub>3</sub>) δ 7.34 (d, *J* = 8.3 Hz, 2H, H-arom.), 7.15 (d, *J* = 8.2 Hz, 2H, H-arom.), 4.73 (s, 2H, CH<sub>2</sub>), 0.94 – 0.90 (m, 9H, CH<sub>3</sub>-*t*-butyl-Si), 0.08 (s, 6H, CH<sub>3</sub>-Si).

<sup>13</sup>C NMR (101 MHz, CDCl<sub>3</sub>) δ 143.6, 128.4, 126.6, 126.4, 126.5, 124.2, 64.5, 26.1, 18.6, -5.1.

<sup>19</sup>F NMR (376 MHz, CDCl<sub>3</sub>) δ -65.3.

ESI<sup>+</sup>MS calculated for C<sub>15</sub>H<sub>21</sub>F<sub>3</sub>NOSi ([M+Na]<sup>+</sup>): 353.1273, found: 353.27. Exact mass could not be determined, but all other analytical data are in full agreement with the literature.<sup>4</sup>



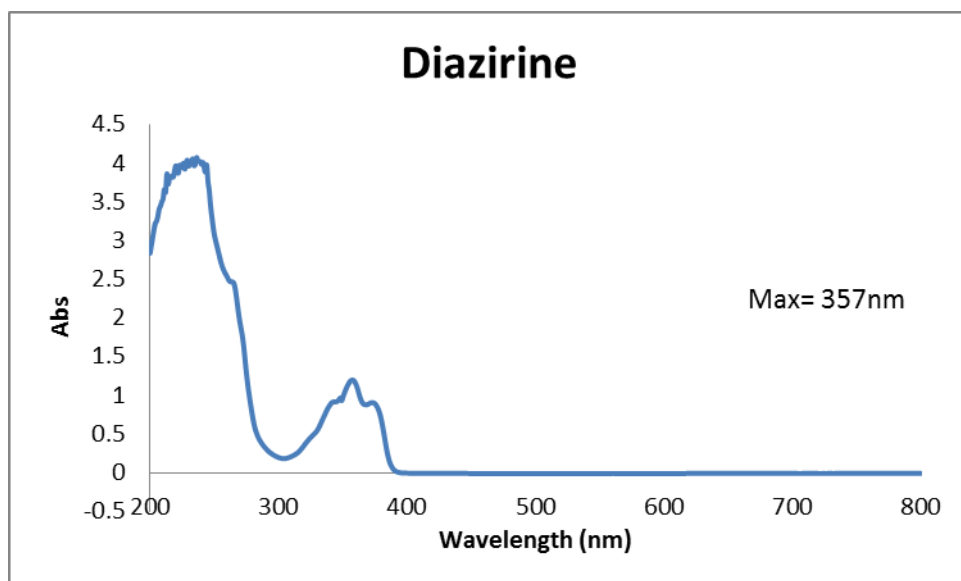

**Figure S13.** UV absorbance spectrum of compound **S7**.

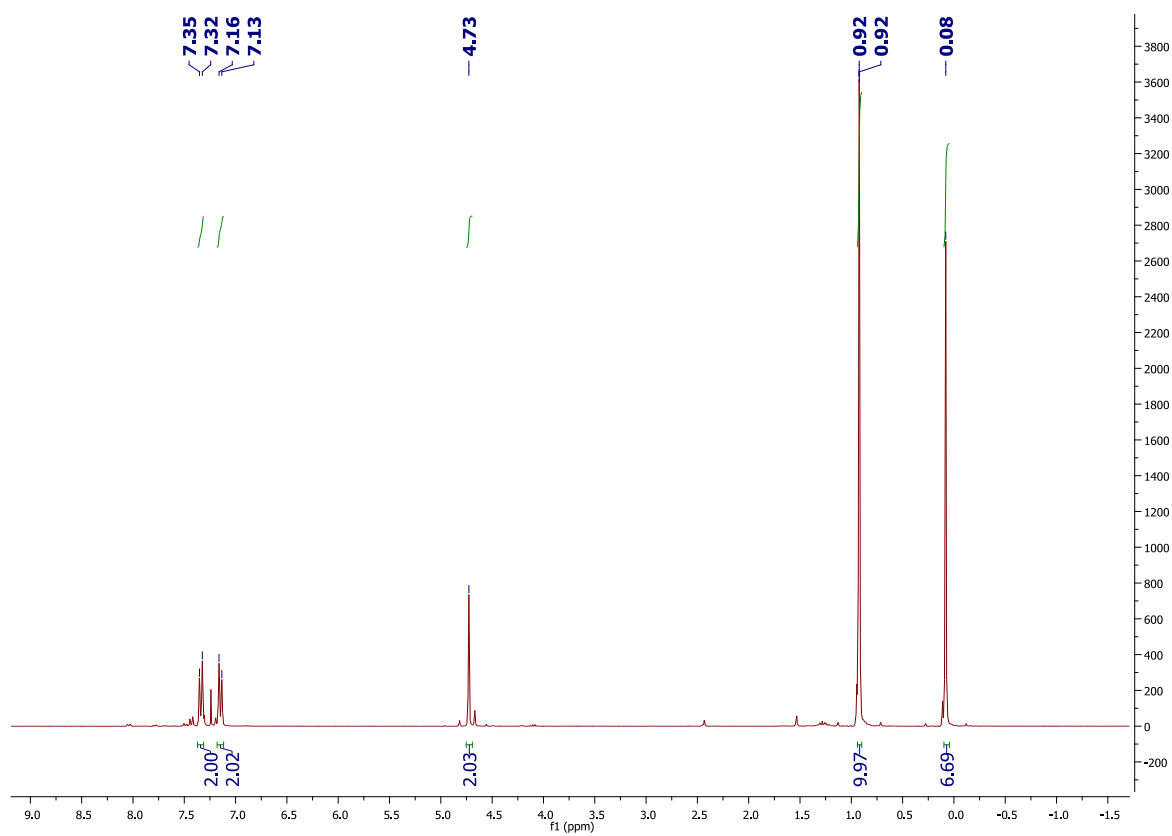

**Figure S14.** <sup>1</sup>H NMR of compound **S7**.

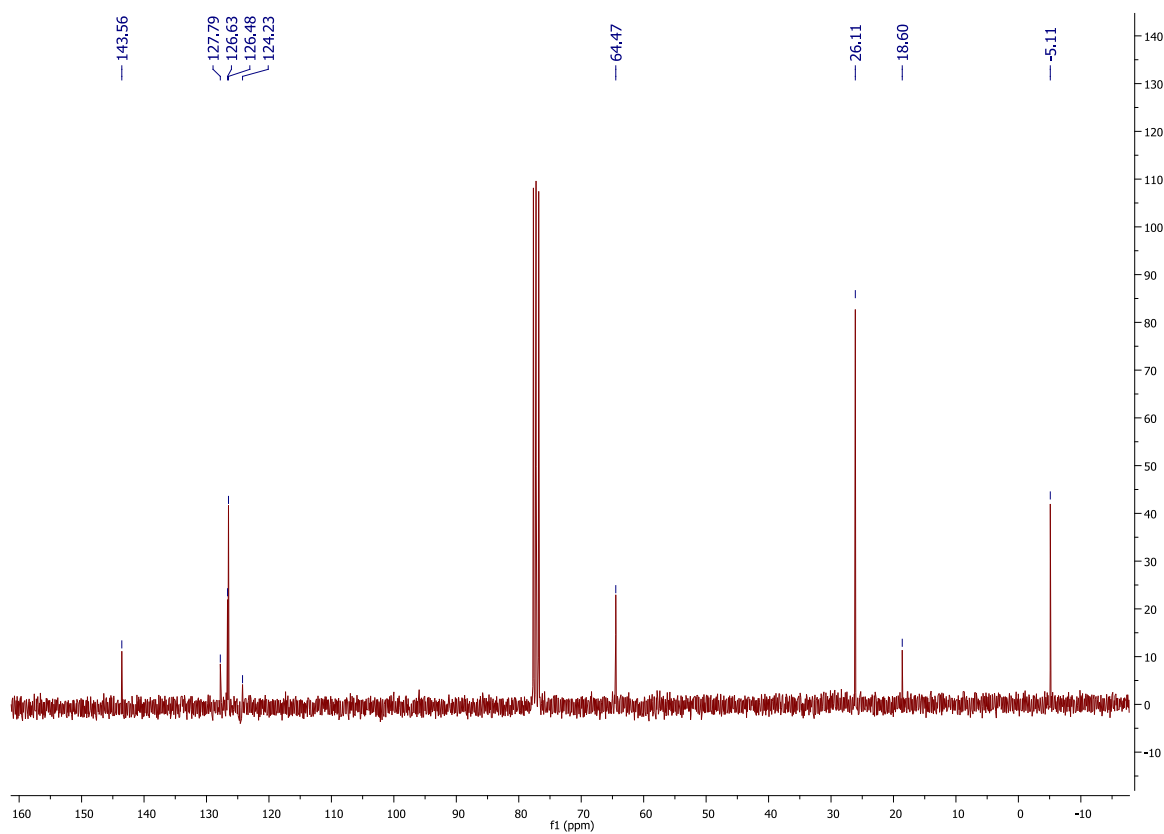

**Figure S15.** <sup>13</sup>C NMR of compound S7.

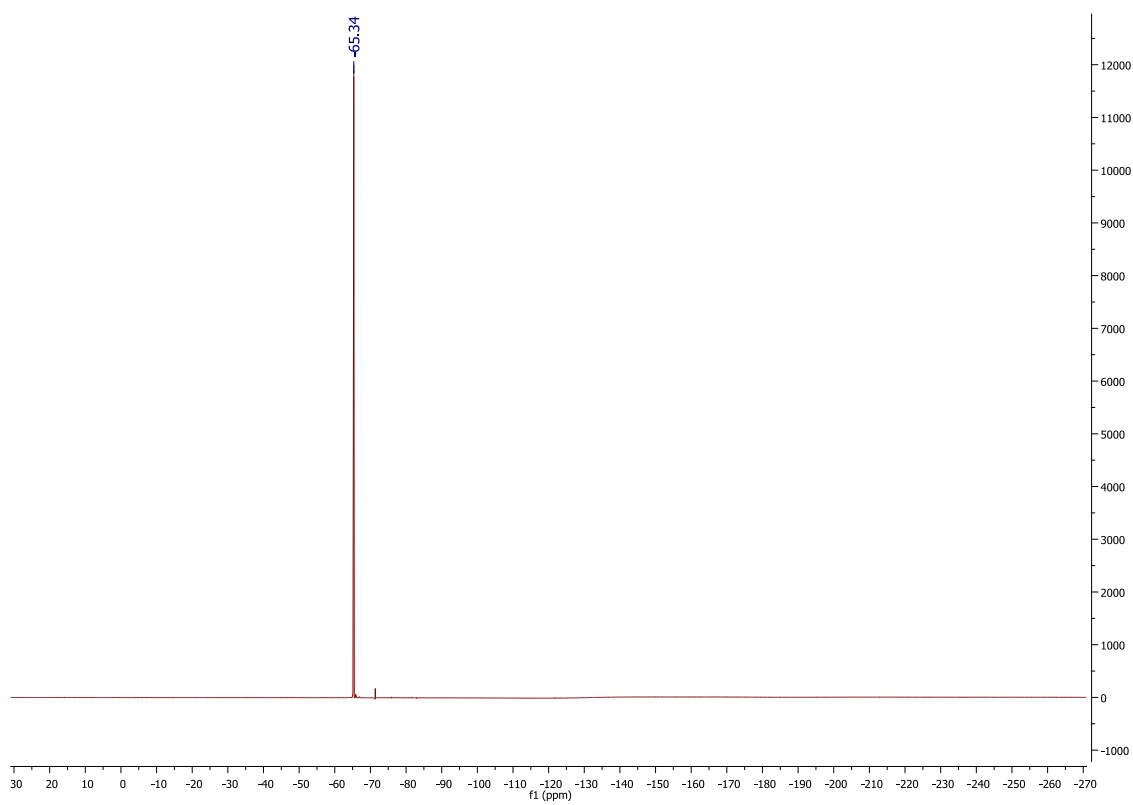

**Figure S16.** <sup>19</sup>F NMR of compound S7.

**(4-(3-(trifluoromethyl)-3H-diazirin-3-yl)phenyl)methanol (S8)**

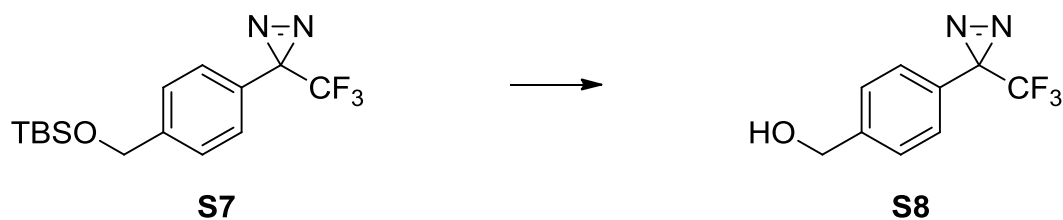

To a stirring solution of compound **S7** (2.86 g, 8.7 mmol) in MeOH (20 mL) at 0°C was added conc. HCl (2 mL) dropwise over 5 minutes. The resulting solution was stirred for 30 minutes before quenching with sat. NaHCO<sub>3</sub> solution (20 mL). The reaction mixture was diluted with Et<sub>2</sub>O (100 mL) and washed with further sat. NaHCO<sub>3</sub> solution (20 mL) and brine (20 mL). resulting organic layer was then dried over MgSO<sub>4</sub>, filtered and reduced to dryness *in vacuo* to yield 2.94 g of compound **S8** as a pale yellow solution. Carried through to the next step without further purification.

Analytical data for compound **S8**

TLC (CH<sub>2</sub>Cl<sub>2</sub>) *R<sub>f</sub>* = 0.38

<sup>1</sup>H NMR (300 MHz, CDCl<sub>3</sub>) δ 7.38 (d, *J* = 8.6 Hz, 2H, CH-arom.), 7.17 (d, *J* = 8.1 Hz, 2H, CH-arom.), 4.70 (s, 2H, CH<sub>2</sub>).

<sup>13</sup>C NMR (101 MHz, CDCl<sub>3</sub>) δ 142.8, 128.7, 127.4, 126.9, 124.2 (d, *J* = 274.7 Hz), 64.7.

<sup>19</sup>F NMR (376 MHz, CDCl<sub>3</sub>) δ -65.31.

ESI<sup>+</sup>-HRMS calculated for C<sub>9</sub>H<sub>7</sub>F<sub>3</sub>N<sub>2</sub>O ([M+H]<sup>+</sup>): 217.0589, found: 217.0467.

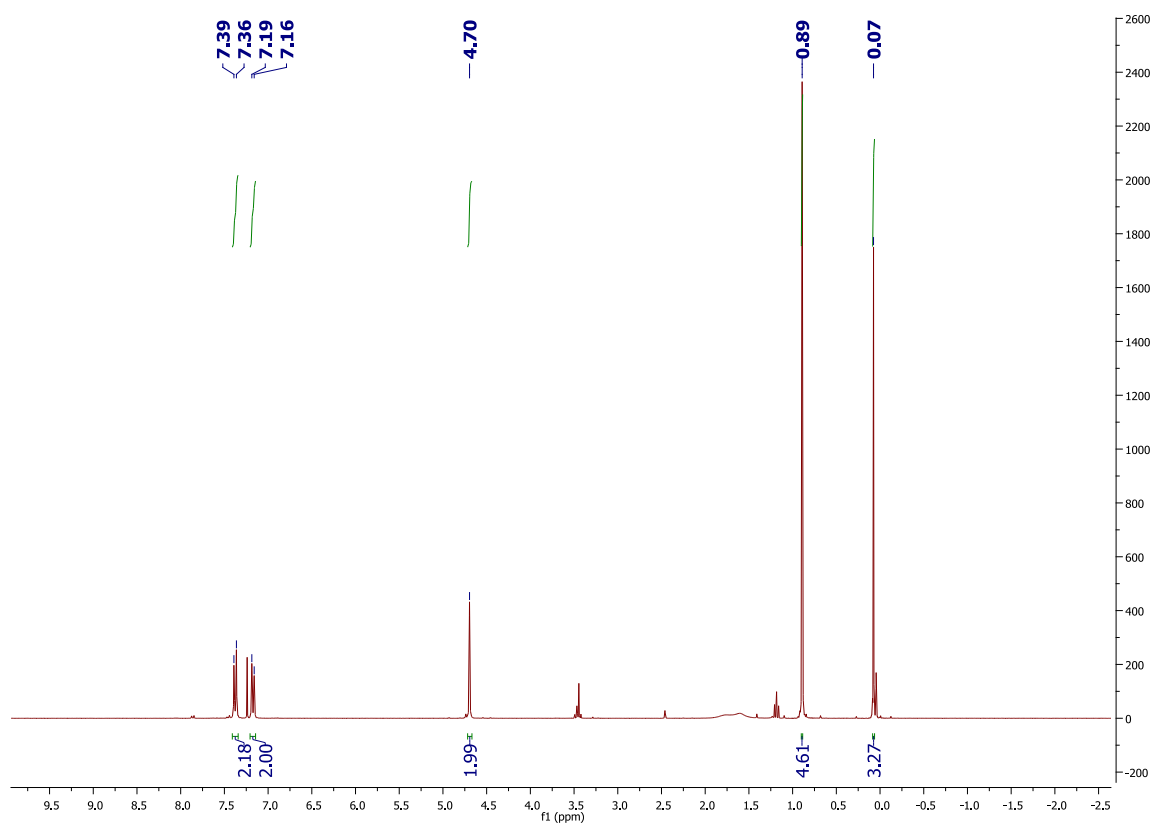

**Figure S17.** <sup>1</sup>H NMR of compound **S8**.

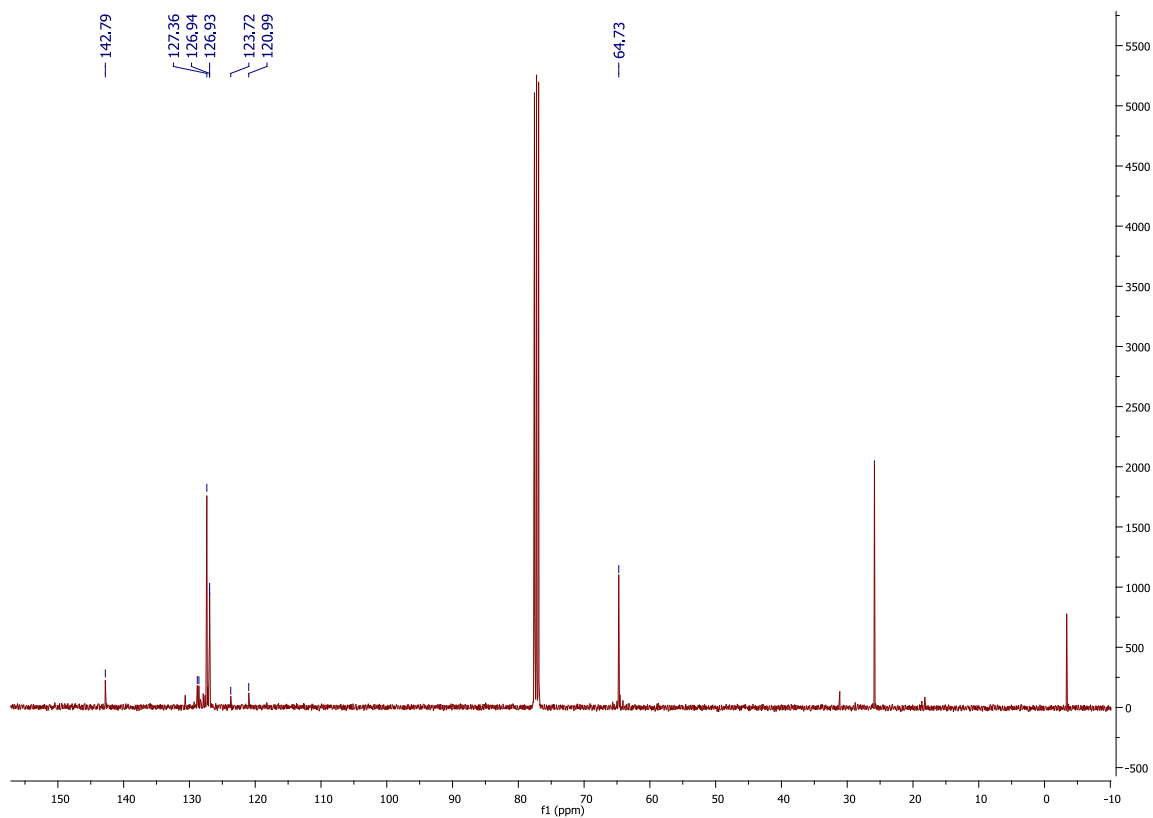

**Figure S18.** <sup>13</sup>C NMR of compound **S8**.

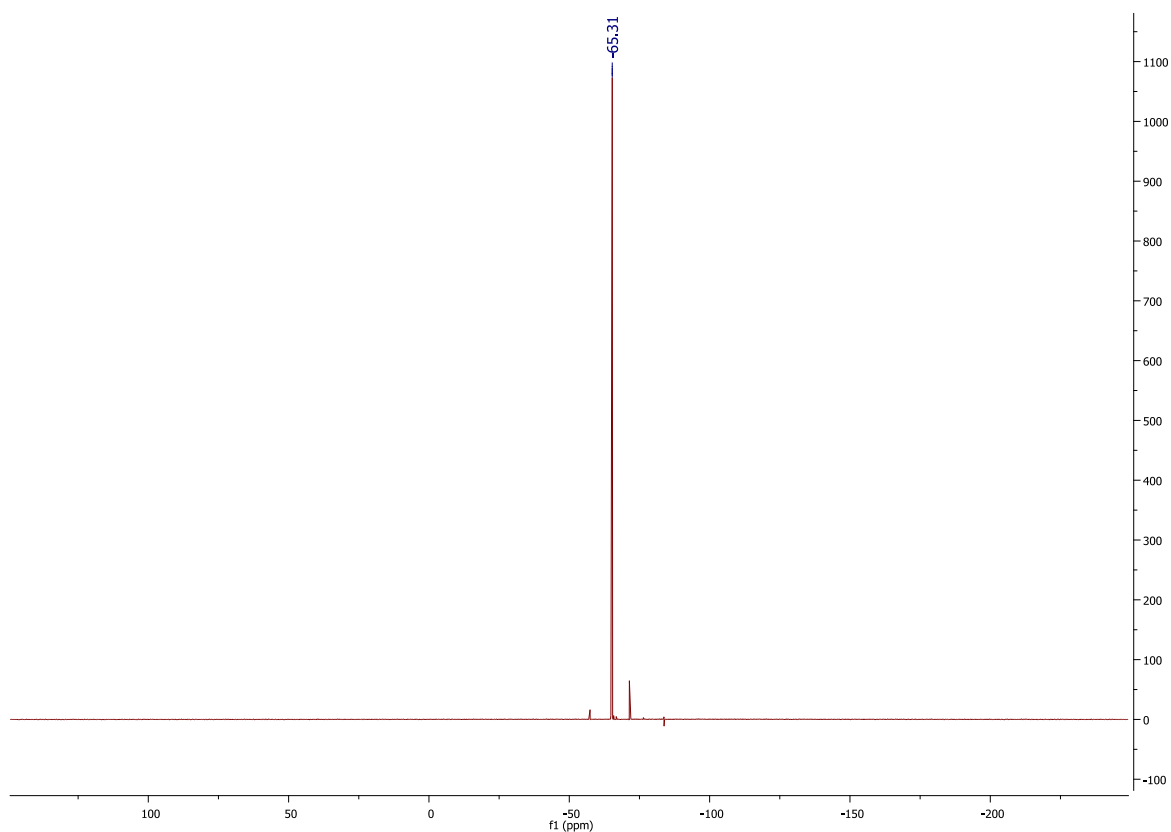

**Figure S19.**  $^{19}\text{F}$  NMR of compound **S8**.

**3-(4-(iodomethyl)phenyl)-3-(trifluoromethyl)-3H-diazirine (1)**

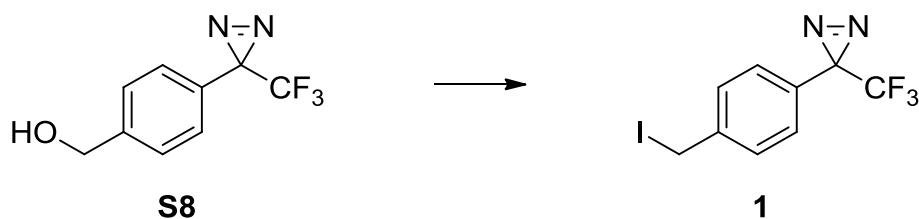

To a stirring solution of compound **S8** (1.87 g, 8.7 mmol) in dry MeCN (20 mL) in the dark was added methyltriphenoxyposphonium iodide (6.32g, 13.9 mmol) and the reaction mixture was stirred at room temperature for 4.5 hours. A 10%  $\text{Na}_2\text{SO}_3$  solution (20 mL) was added to quench the reaction and remove excess  $\text{I}_2$ . The reaction mixture was then diluted with  $\text{Et}_2\text{O}$  (100mL) and was washed with further 10%  $\text{Na}_2\text{SO}_3$  solution (10 mL), followed by brine (10 mL). The resulting organic layer was then dried over  $\text{MgSO}_4$ , filtered and reduced to dryness *in vacuo*. The residue was dissolved in hexanes/ $\text{CH}_2\text{Cl}_2$  7:3 and purified by column chromatography (hexanes/ $\text{CH}_2\text{Cl}_2$  7:3) to yield 2.74 g (97%) of a pale yellow liquid.

Even though traces of impurities were detected, compound **1** was used in the next step without further purification.

Analytical data for compound **1**

TLC (hexanes/ $\text{CH}_2\text{Cl}_2$  9:1)  $R_f = 0.62$

$^1\text{H}$  NMR (300 MHz,  $\text{CDCl}_3$ )  $\delta$  7.38 (d,  $J = 8.4$  Hz, 2H, H-arom.), 7.09 (d,  $J = 8.2$  Hz, 2H, H-arom.), 4.40 (s, 2H, CH<sub>2</sub>).

$^{13}\text{C}$  NMR (101 MHz,  $\text{CDCl}_3$ )  $\delta$  141.3, 129.4, 129.0 (d,  $J = 8.8$  Hz) 128.9, 127.2, 127.1, 122.3 (d,  $J = 274.7$  Hz), 3.8.

$^{19}\text{F}$  NMR (376 MHz,  $\text{CDCl}_3$ )  $\delta$  -65.2.

ESI<sup>+</sup>HRMS calculated for  $\text{C}_9\text{H}_6\text{F}_3\text{IN}_2$  ( $[\text{M}+\text{H}]^+$ ) 325.9528. Exact mass could not be determined, but all other analytical data are in full agreement with the literature.<sup>4</sup>

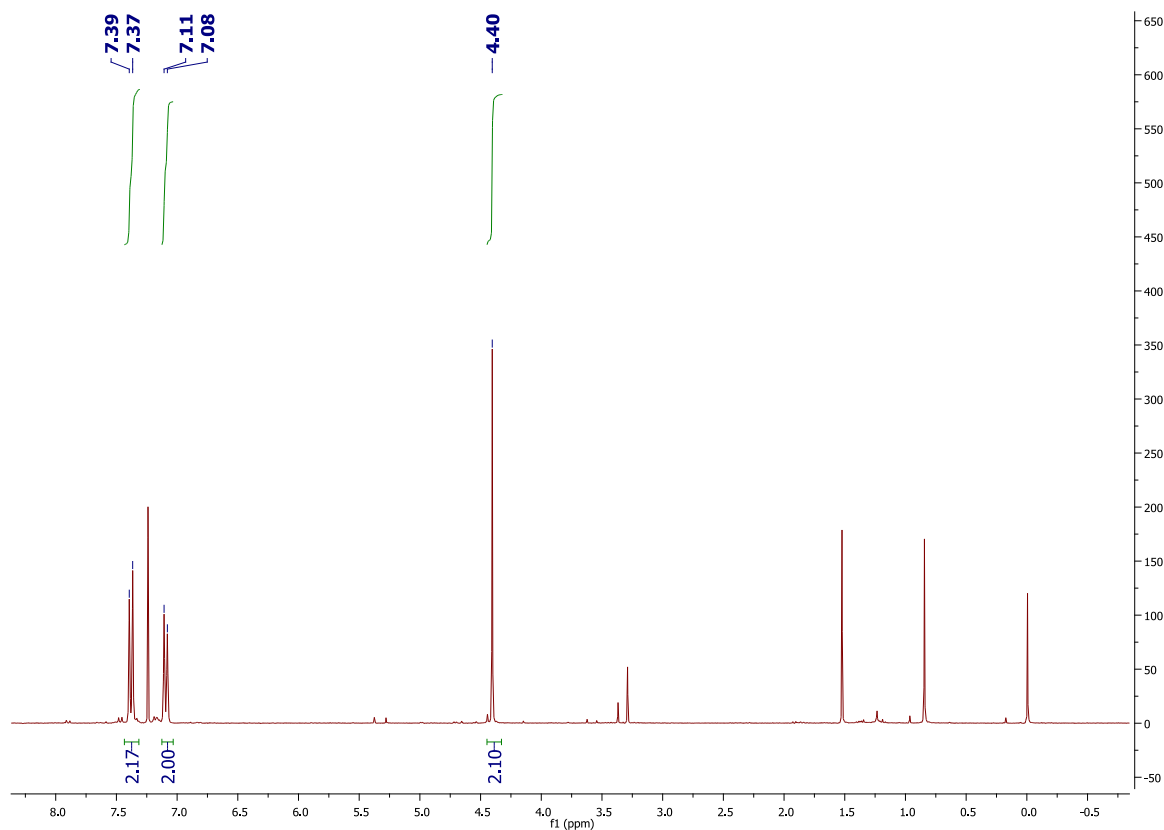

**Figure S20.**  $^1\text{H}$  NMR of compound **1**.

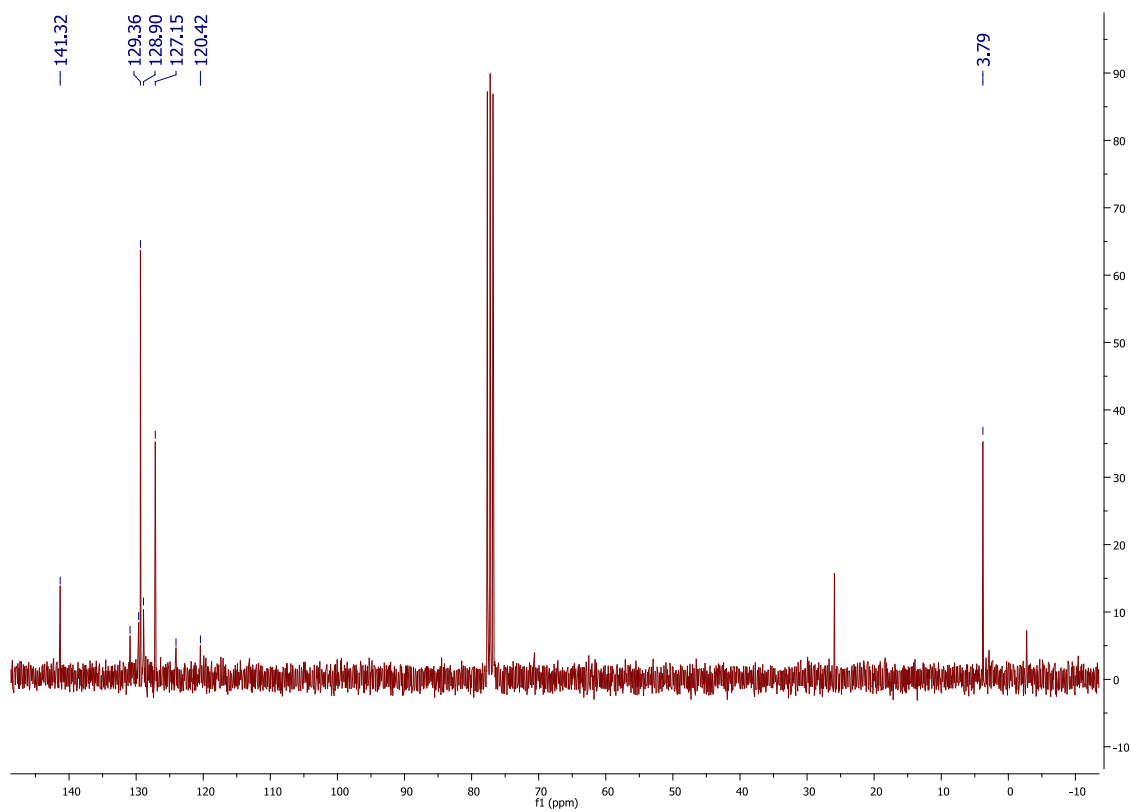

**Figure S21.**  $^{13}\text{C}$  NMR of compound **1**.

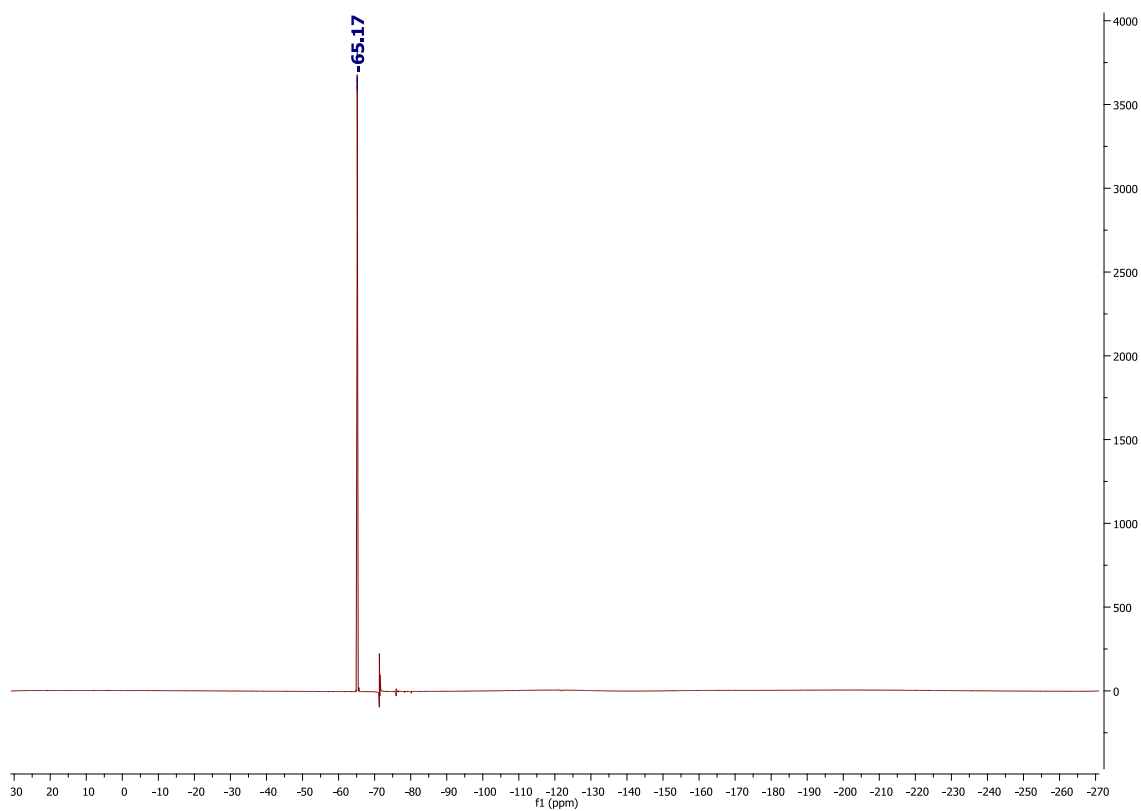

**Figure S22.**  $^{19}\text{F}$  NMR of compound **1**.

### 3-(4-((pent-4-yn-1-yloxy)methyl)phenyl)-3-(trifluoromethyl)-3H-diazirine (**2**)

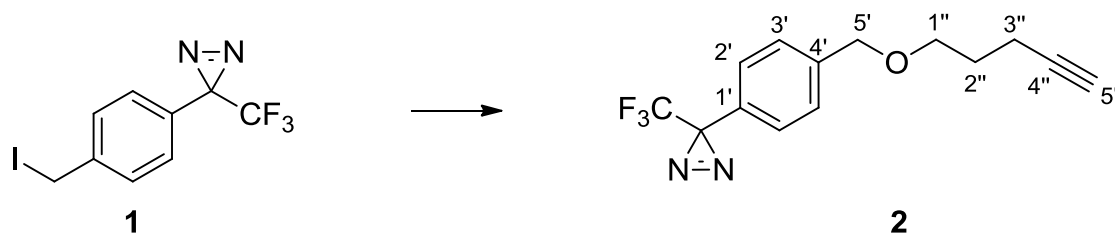

To a stirring solution of 4-pentyn-1-ol (0.44 mL, 4.8 mmol) in dry THF (4 mL) at 0°C under Ar was added NaH (128 mg, 60% dispersion in mineral oil, 3.2 mmol) portionwise over 5 minutes. The resulting suspension was stirred until the formation of bubbles ceased. Compound **1** (520mg, 1.6 mmol) in dry THF (1 mL) was then added dropwise and the reaction mixture stirred for 2 hours. The reaction was quenched with MeOH (5 mL), diluted with Et<sub>2</sub>O (50mL), washed with distilled H<sub>2</sub>O (20 mL), brine (20 mL). The resulting organic layer was dried over MgSO<sub>4</sub>, filtered and reduced to dryness *in vacuo*. The residue was dissolved in hexanes/CH<sub>2</sub>Cl<sub>2</sub> 8:2 and purified by column chromatography (hexanes/CH<sub>2</sub>Cl<sub>2</sub> 8:2) to yield 309 mg (68%) of compound **2** as a pale yellow liquid.

Analytical data for compound **2**

TLC (hexanes/CH<sub>2</sub>Cl<sub>2</sub> 9:1) *R<sub>f</sub>* = 0.43

<sup>1</sup>H NMR (300 MHz, CDCl<sub>3</sub>) δ 7.35 (d, *J* = 8.6 Hz, 2H, H-arom.), 7.16 (d, *J* = 8.1 Hz, 2H, H-arom.), 4.50 (s, 2H, H5'), 3.55 (t, *J* = 6.1 Hz, 2H, H1''), 2.30 (td, *J* = 7.0, 2.6 Hz, 2H, H3''), 1.92 (t, *J* = 2.7 Hz, 1H, H5''), 1.86 – 1.75 (m, 2H, H2'').

<sup>13</sup>C NMR (101 MHz, CDCl<sub>3</sub>) δ 140.7, 128.5, 128.0, 126.8, 126.8, 122.4 (d, *J* = 274.6 Hz), 84.0, 72.4, 69.1, 68.8, 28.8, 15.5.

<sup>19</sup>F NMR (376 MHz, CDCl<sub>3</sub>) δ -65.3.

ESI<sup>+</sup>-HRMS calculated for C<sub>13</sub>H<sub>14</sub>F<sub>3</sub>N<sub>2</sub>O ([M+Na]<sup>+</sup>): 305.0872, found: 305.0875.



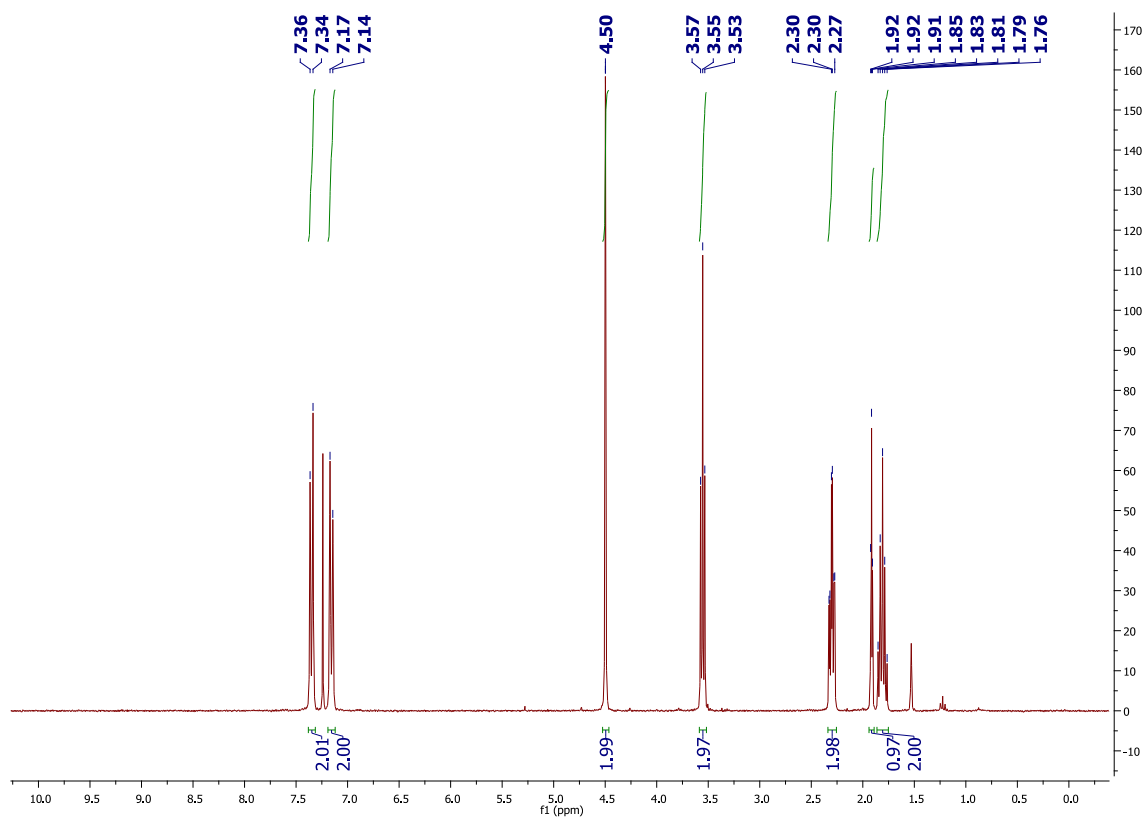

Figure S23. <sup>1</sup>H NMR of compound 2.

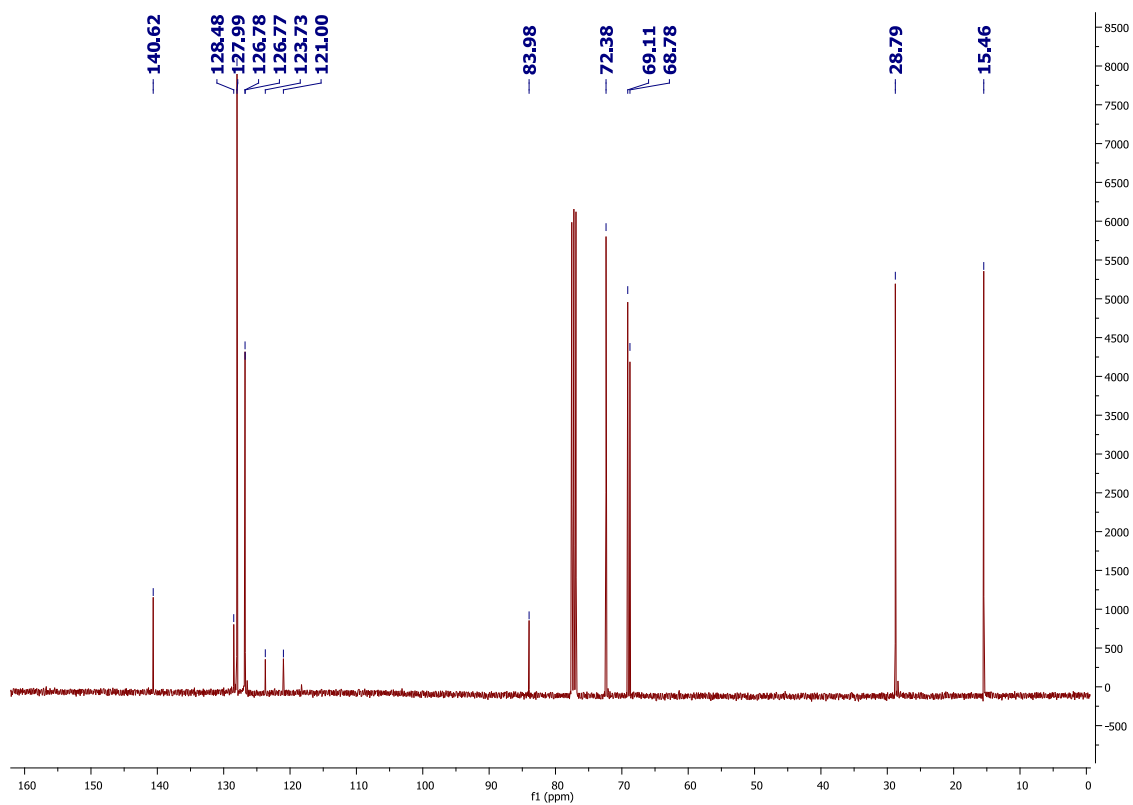

Figure S24. <sup>13</sup>C NMR of compound 2.

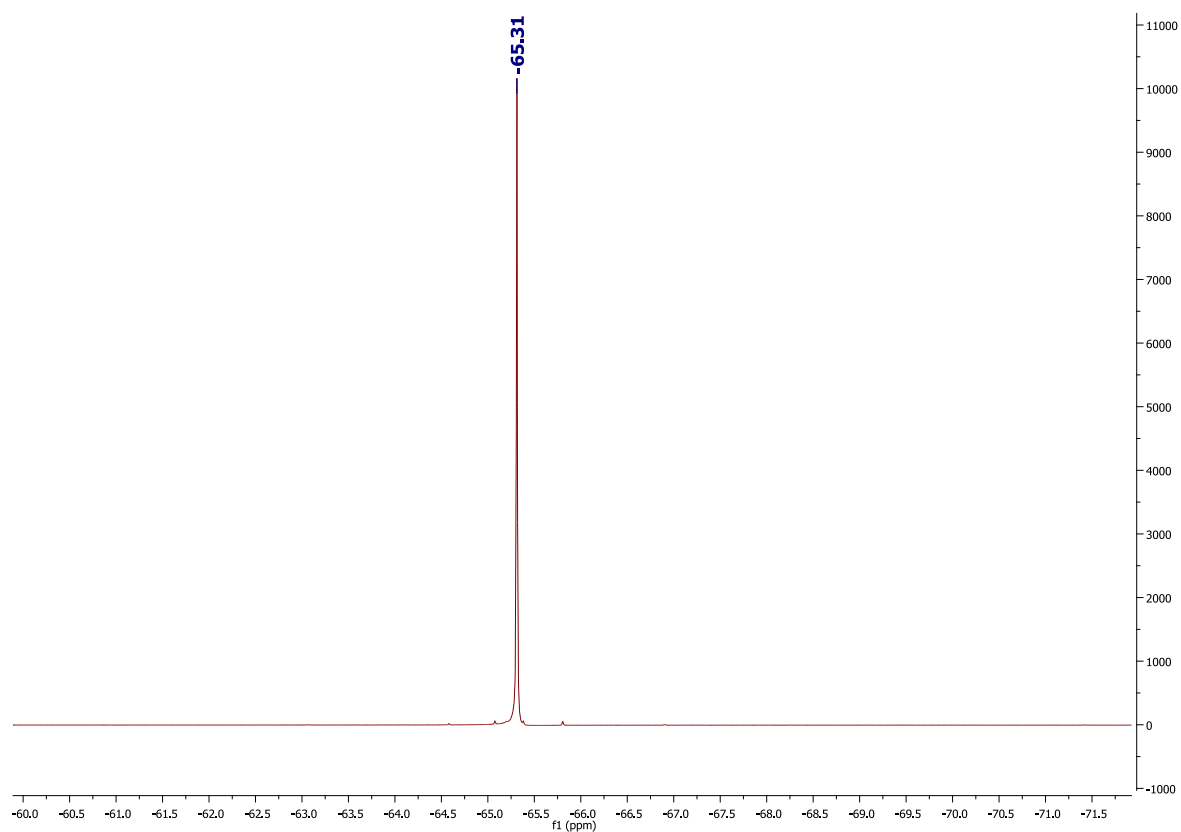

**Figure S25.**  $^{19}\text{F}$  NMR of compound **2**.

**5'-O-(4,4'-dimethoxytrityl)-5-(pent-1''-yn-5''-oxy-(methyl-phenyl-10''-(trifluoromethyl)-3*H*-diazirin)-1''-yl)-uridine (**4**)**

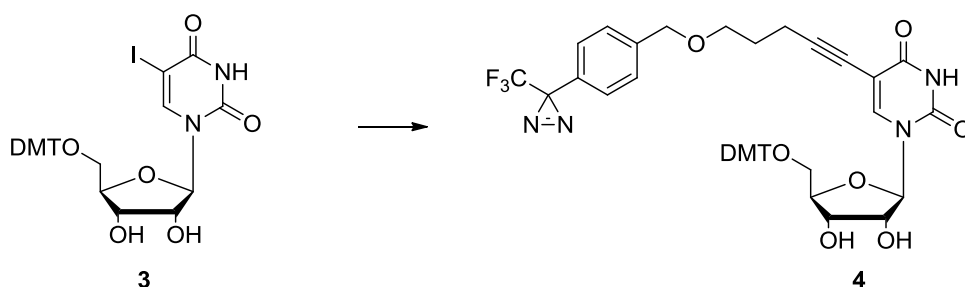

A solution of compounds **3** (1.15g . 1.71 mmol) and **2** (724 mg, 2.57 mmol) in dry DMF (4 mL) was degassed at  $-78^{\circ}\text{C}$  and kept under Ar. CuI (65 mg, 0.34 mmol),  $\text{Et}_3\text{N}$  (0.45 mL, 3.42 mmol) and  $\text{Pd}(\text{PPh}_3)_2\text{Cl}_2$  (120 mg, 0.17 mmol) were added in turn and the reaction mixture was stirred at room temperature in the dark for 18 hours. The reaction mixture was then

diluted with EtOAc (50 mL) and washed with NaHCO<sub>3</sub> (2x 10 mL), brine (10 mL), dried over MgSO<sub>4</sub>, filtered and reduced to dryness *in vacuo*. The residue was dissolved in CH<sub>2</sub>Cl<sub>2</sub> and purified by column chromatography (0-3% MeOH in CH<sub>2</sub>Cl<sub>2</sub>) and to yield 1.19 g (84%) of compound **4** as a pale orange foam.

Analytical data for compound **4**

TLC (CH<sub>2</sub>Cl<sub>2</sub>/MeOH 95:5) *R<sub>f</sub>* = 0.41

<sup>1</sup>H NMR (300 MHz, CDCl<sub>3</sub>) δ 8.05 (s, 1H, H6), 7.40 (d, *J* = 7.3 Hz, 2H, H-arom.), 7.34 – 7.07 (m, 11H, H-arom.), 6.80 (d, *J* = 8.1 Hz, 4H, H-arom.), 5.84 (d, *J* = 3.8 Hz, 1H, H1'), 4.43 – 4.31 (m, 4H, H6'', H2' and H3'), 4.22 (s, 1H, H4'), 3.72 (d, *J* = 0.4 Hz, 6H, CH3-*O*-phenyl), 3.47 – 3.25 (m, 4H, H5' and H5''), 2.17 (m, 2H, H3''), 1.51 (p, *J* = 6.7 Hz, 2H, H4'').

<sup>13</sup>C NMR (101 MHz, CDCl<sub>3</sub>) δ 162.6, 158.8, 150.6, 144.7, 141.8, 140.7, 135.8, 135.7, 130.2, 130.2, 128.3, 128.2, 128.1, 127.9, 127.1, 126.7, 122.4 (d, *J* = 274.7 Hz), 113.5, 101.3, 95.0, 91.2, 87.2, 84.9, 76.1, 72.1, 71.1, 70.9, 69.3, 62.8, 55.4, 28.5, 16.5.

<sup>19</sup>F NMR (376 MHz, CDCl<sub>3</sub>) δ -65.3.

ESI<sup>+</sup>-HRMS calculated for C<sub>44</sub>H<sub>41</sub>F<sub>3</sub>N<sub>4</sub>O<sub>9</sub> ([M+Na]<sup>+</sup>): 849.2718, found: 849.2697.

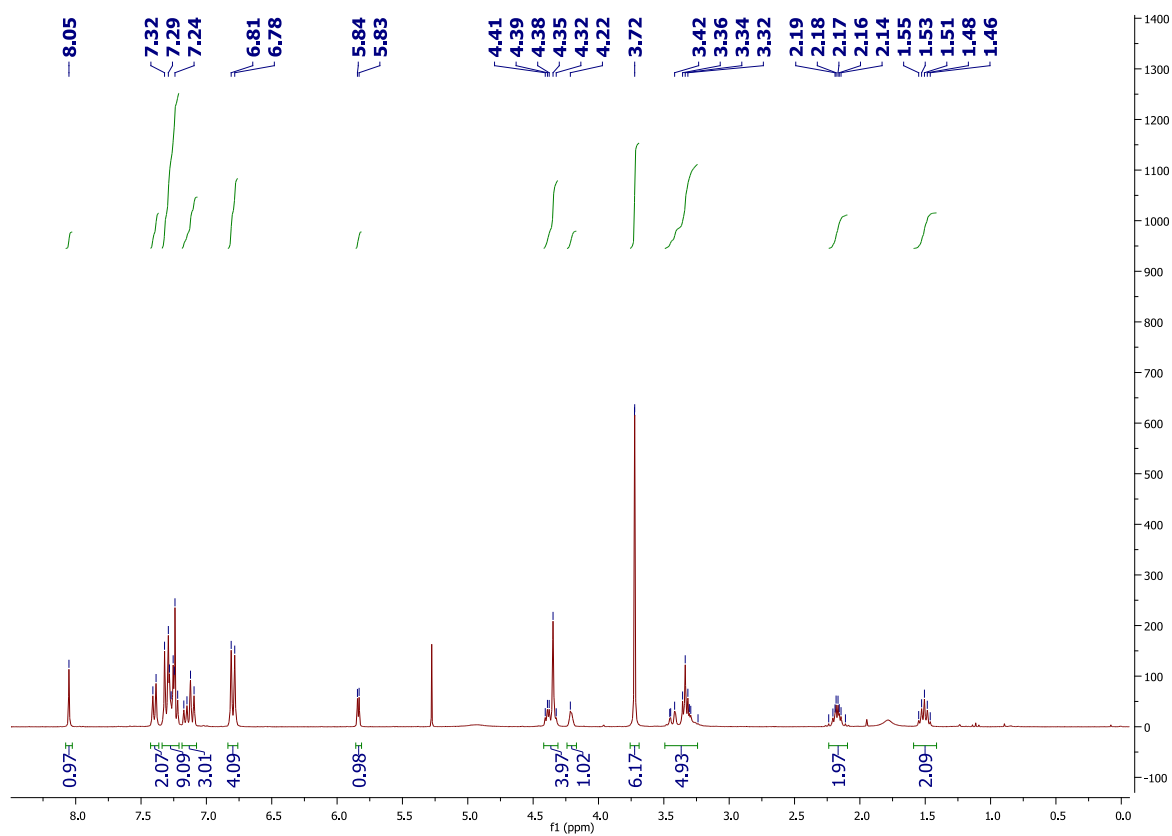

Figure S26. <sup>1</sup>H NMR of compound 4.

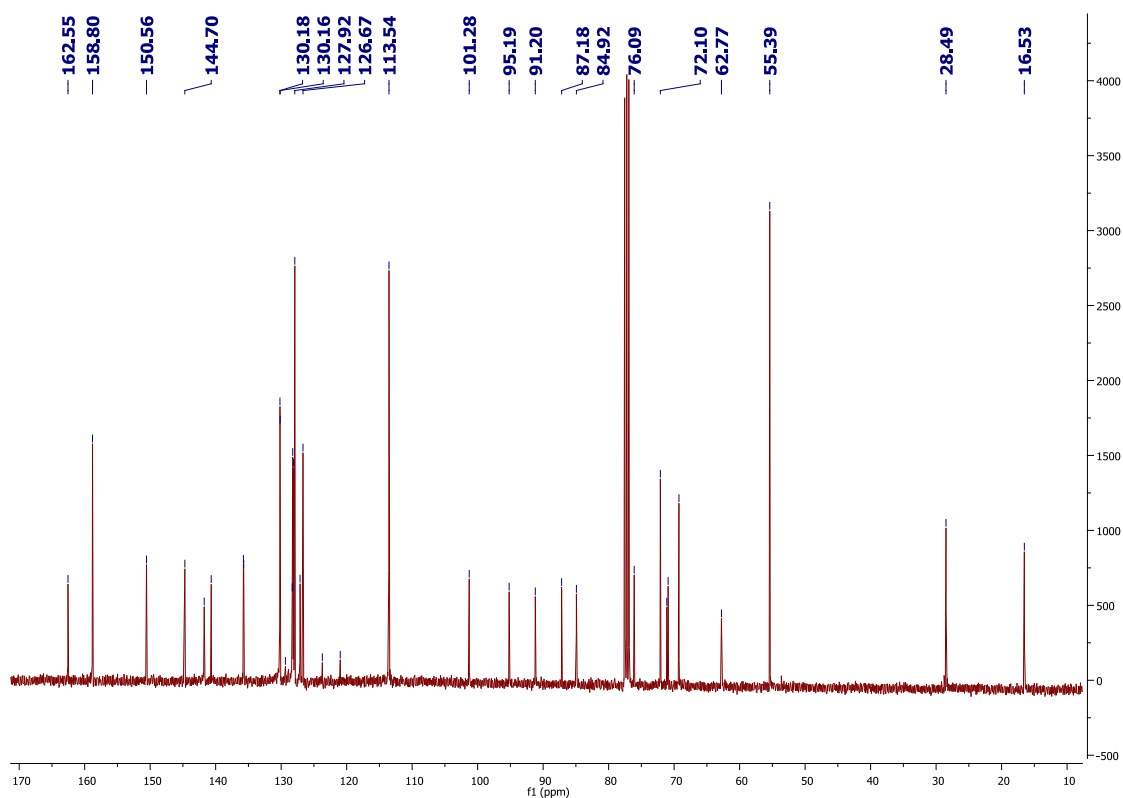

Figure S27. <sup>13</sup>C NMR of compound 4.

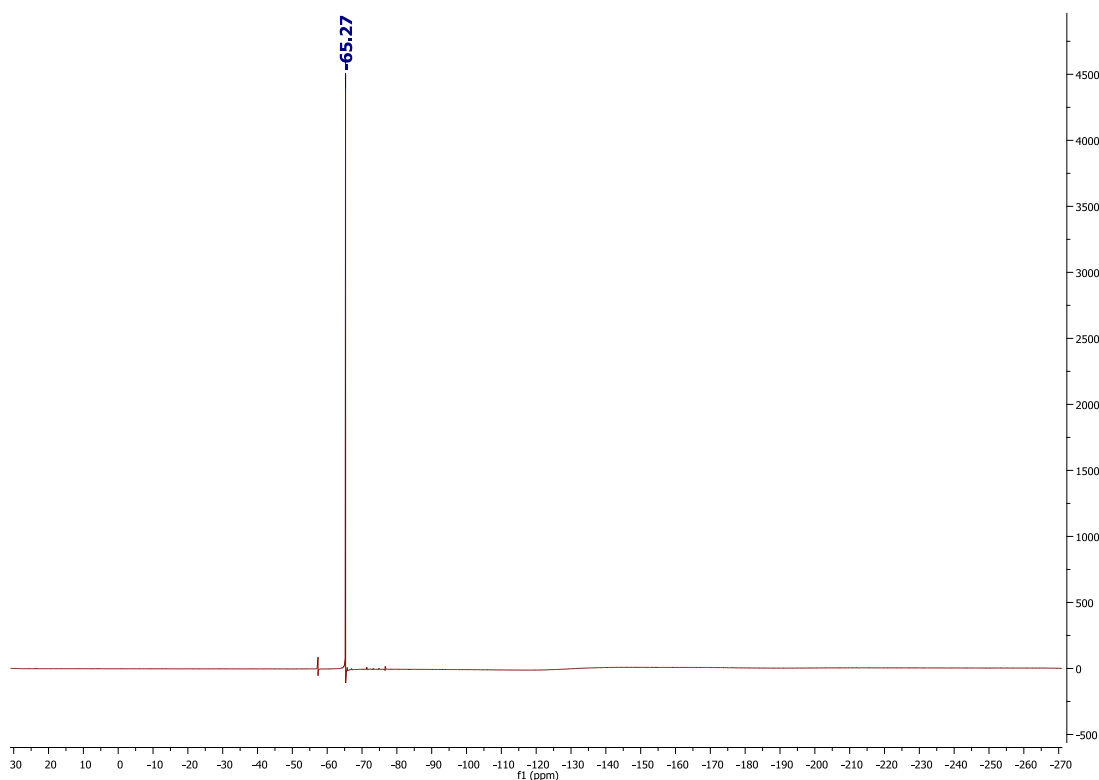

**Figure S28.**  $^{19}\text{F}$  NMR of compound **4**.

**2'-O-(*t*-butyldimethylsilyl))-5'-O-(4,4'-dimethoxytrityl)-5-(pent-1''-yn-5''-oxy-(methyl-phenyl-10''-(trifluoromethyl)-3*H*-diazirin)-1''-yl)-uridine (**5**)**

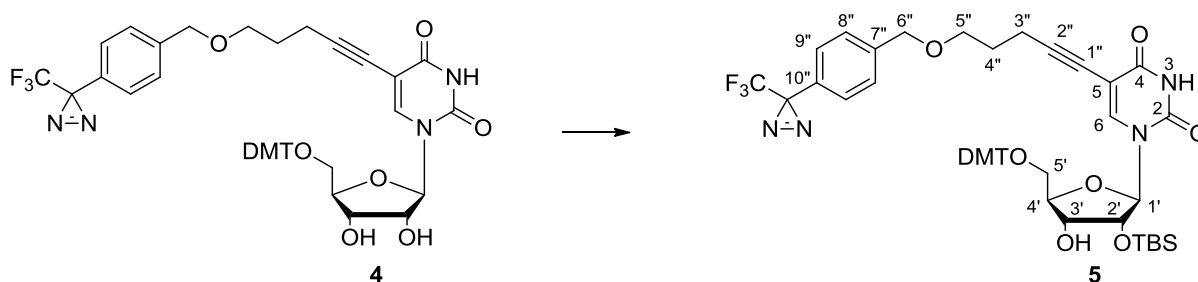

To a stirring solution of compound **4** (286 mg, 0.35 mmol) in dry THF (3 mL) in the dark, was added pyridine (0.1 mL, 1.28 mmol) and silver nitrate (71 mg, 0.42 mmol). The solution was stirred at room temperature until the silver nitrate dissolved (~20 minutes). TBDMS-Cl (68 mg, 0.45 mmol) was then added and the reaction mixture stirred for 26 hours at room temperature. The reaction mixture was diluted with EtOAc (30 mL), washed with sat.  $\text{NaHCO}_3$  (10 mL), brine (10 mL). The resulting organic layer was dried over  $\text{MgSO}_4$ , filtered

and reduced to dryness *in vacuo*. The residue was dissolved in hexanes/EtOAc 8:2 and purified by column chromatography (hexanes/EtOAc 8:2) to yield 234 mg (72%) of compound **5** as a colorless foam.

Analytical data for compound **5**

TLC (CH<sub>2</sub>Cl<sub>2</sub>/MeOH 99:1) *R<sub>f</sub>* = 0.43

<sup>1</sup>H NMR (300 MHz, CDCl<sub>3</sub>) δ 8.09 (s, 1H, H3), 8.02 (s, 1H, H6), 7.41 (d, *J* = 7.3 Hz, 2H, H-arom.), 7.34 – 7.09 (m, 11H, H-arom.), 6.80 (d, *J* = 8.3 Hz, 4H, H-arom.), 5.98 (d, *J* = 5.5 Hz, 1H, H1'), 4.47 (t, *J* = 5.1 Hz, 1H, H2'), 4.32 (s, 2H, H6''), 4.21 (s, 1H, H3'), 4.13 (d, *J* = 6.3 Hz, 1H, H4'), 3.74 (d, *J* = 1.6 Hz, 6H, CH<sub>3</sub>-*O*-phenyl), 3.47 (d, *J* = 11.1 Hz, 1H, H5'), 3.29 (dd, *J* = 13.4, 7.3 Hz, 3H, H5' and H5''), 2.66 (d, *J* = 3.6 Hz, 1H, 3'OH), 2.09 (dd, *J* = 7.3, 5.5 Hz, 2H, H3''), 1.40 (t, *J* = 6.6 Hz, 2H, H4''), 0.89 (s, 9H, CH<sub>3</sub>-*t*-butyl-Si), 0.10 (s, 6H, CH<sub>3</sub>-Si).

<sup>13</sup>C NMR (101 MHz, CDCl<sub>3</sub>) δ 161.7, 158.9, 149.5, 144.7, 141.6, 140.7, 135.6, 135.6, 130.2, 130.2, 128.3, 128.3, 128.1, 127.9, 127.2, 126.7, 122.4 (d, *J* = 274.7 Hz), 113.6, 101.6, 95.0, 88.4, 87.5, 84.3, 76.6, 72.1, 71.7, 70.9, 69.3, 63.4, 55.42, 28.4, 25.81, 18.19, 16.50, -4.57, -4.97.

<sup>19</sup>F NMR (376 MHz, CDCl<sub>3</sub>) δ -65.3.

ESI<sup>+</sup>-HRMS calculated for C<sub>50</sub>H<sub>55</sub>F<sub>3</sub>N<sub>4</sub>O<sub>9</sub>Si ([M+Na]<sup>+</sup>): 963.3583, found: 963.3583.

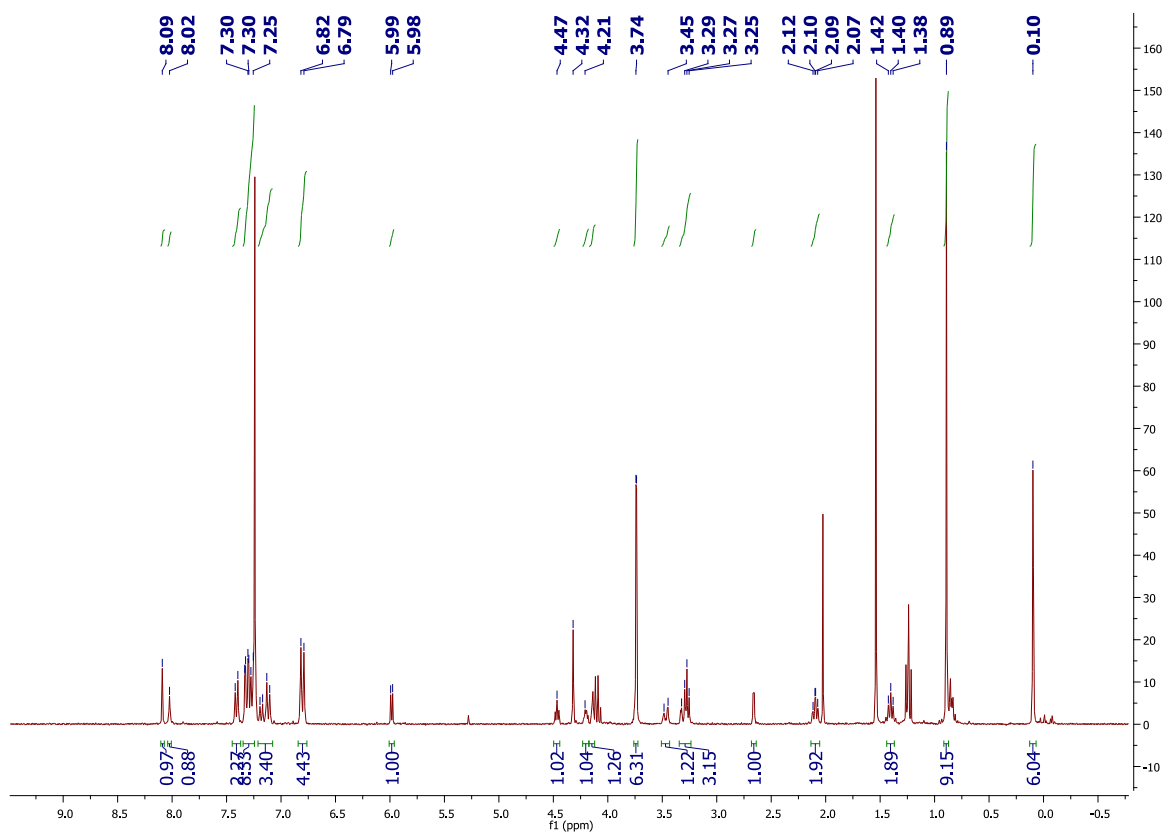

Figure S29. <sup>1</sup>H NMR of compound 5.

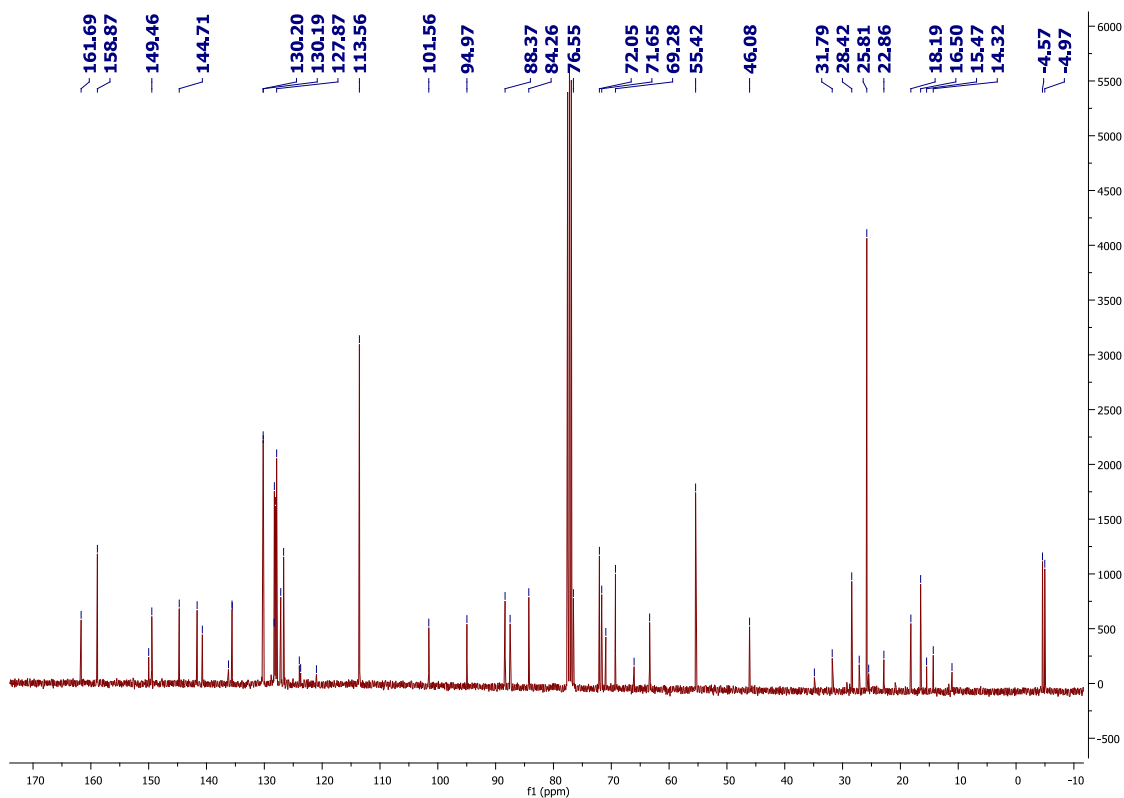

Figure S30. <sup>13</sup>C NMR of compound 5.

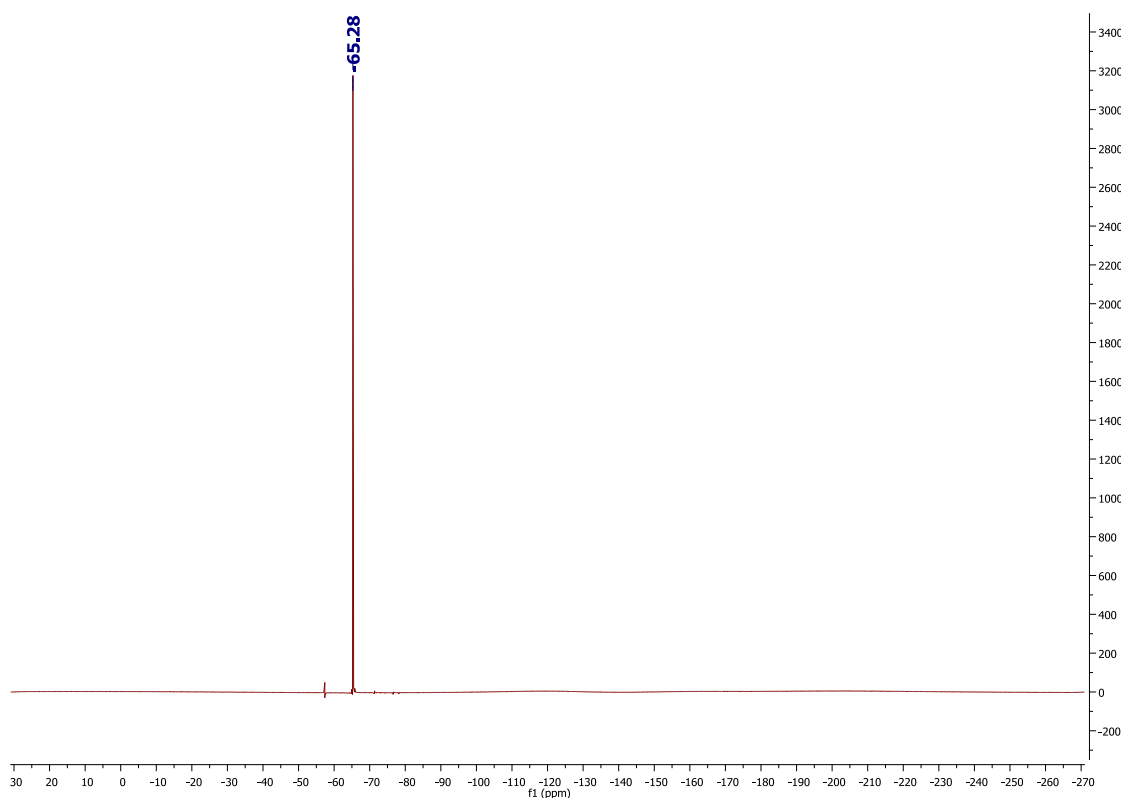

**Figure S31.**  $^{19}\text{F}$  NMR of compound **5**.

**2'-O-(*t*-butyldimethylsilyl))-3'-O-(2-cyanoethoxy)diisopropylaminophosphyno-5'-O-(4,4'-dimethoxytrityl)-5-(pent-1"-yn-5"-oxy-(methyl-phenyl-10"- (trifluoromethyl)-3*H*-diazirin)-1"-yl)-uridine ( $\text{U}^{\text{Dz}}$ )**

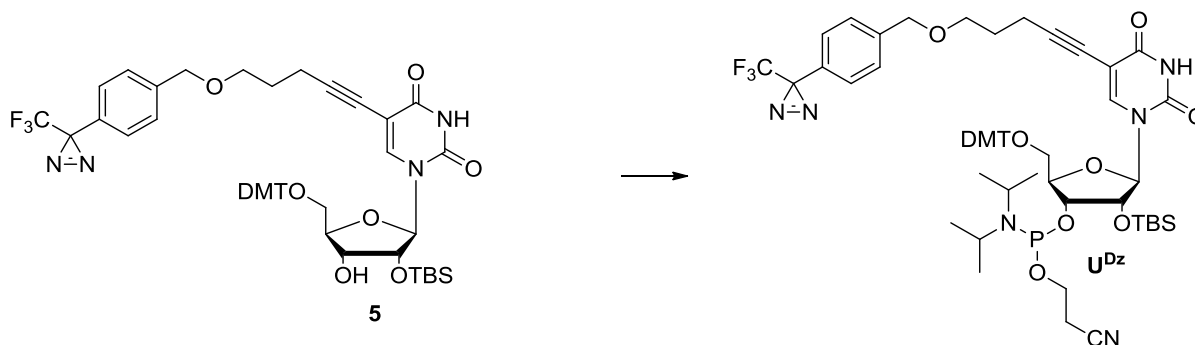

To a stirring solution of nucleoside **5** (230 mg, 0.24 mmol) in dry THF (2.5 mL) were added DIPEA (0.26 mL, 1.47 mmol) and CEP-Cl (0.21 mL, 0.73 mmol). The reaction mixture was stirred at room temperature under Ar for 1 hour. The reaction mixture was then diluted with  $\text{CH}_2\text{Cl}_2$  (20 mL) and washed with sat.  $\text{NaHCO}_3$  solution (10 mL) and brine (10 mL). The organic layer was then dried over  $\text{MgSO}_4$ , filtered and reduced to dryness *in vacuo*. The



residue was dissolved in hexanes/EtOAc 1:1 and purified by column chromatography (hexanes/EtOAc 1:1). In order to remove the remaining impurities (as determined by  $^1\text{H}$  and  $^{31}\text{P}$  NMR), the residue was dissolved in  $\text{CH}_2\text{Cl}_2$  and re-purified by column chromatography (0-2% MeOH in  $\text{CH}_2\text{Cl}_2$ ) and reduced to dryness *in vacuo* to yield 208 mg (78%) of  $\text{U}^{\text{Dz}}$  as a colourless foam.

Analytical data for  $\text{U}^{\text{Dz}}$

TLC ( $\text{CH}_2\text{Cl}_2/\text{MeOH}$  98:2)  $R_f = 0.93$

$^1\text{H}$  NMR (400 MHz,  $\text{CDCl}_3$ )  $\delta$  8.15, 8.10 (2s, 1H,  $\underline{\text{H}}_6$ ), 7.54 – 7.06 (m, 13H,  $\underline{\text{H}}$ -arom.), 6.81 (dd,  $J = 8.6, 7.2$  Hz, 4H,  $\underline{\text{H}}$ -arom.), 6.07 (d,  $J = 7.0$  Hz, 0.5H,  $\underline{\text{H}}_1$ ), 5.97 (d,  $J = 6.2$  Hz, 0.5H,  $\underline{\text{H}}_1$ ), 4.60 – 4.41 (m, 1H,  $\underline{\text{H}}_2'$ ), 4.38 – 4.23 (m, 2H,  $\underline{\text{H}}_6''$ ), 4.20 – 4.11 (m, 1H,  $\underline{\text{H}}_3'$ ), 3.89 (m, 1H,  $\underline{\text{H}}_7'$ ), 3.76 – 3.71 (m, 6H,  $\underline{\text{CH}}_3\text{-O-phenyl}$ ), 3.63 – 3.40 (m, 4H,  $\underline{\text{H}}_7'$ ,  $\text{H}_{10}'$  and  $\underline{\text{H}}_5'$ ), 3.32 – 3.18 (m, 3H,  $\underline{\text{H}}_5''$  and  $\underline{\text{H}}_5'$ ), 2.77 – 2.21 (m, 2H,  $\underline{\text{H}}_8'$ ), 2.17 – 2.03 (m, 2H,  $\underline{\text{H}}_3''$ ), 1.38 (m, 2H,  $\underline{\text{H}}_4''$ ), 1.22 – 1.08 (m, 9H,  $\underline{\text{H}}_{11}'$ ), 0.98 (d,  $J = 6.8$  Hz, 3H,  $\underline{\text{H}}_{11}'$ ), 0.86 (m, 9H,  $\underline{\text{CH}}_3\text{-}t\text{-butyl-Si}$ ), 0.08- -0.02 (m, 6H,  $\underline{\text{CH}}_3\text{-Si}$ ).

$^{13}\text{C}$  NMR (101 MHz,  $\text{CDCl}_3$ )  $\delta$  161.6, 161.5, 158.9, 149.5, 149.4, 144.7, 144.7, 141.9, 141.8, 140.8, 135.8, 135.6, 135.5, 130.4, 130.3, 130.2, 128.3, 128.2, 128.0, 127.9, 127.2, 127.2, 126.7, 117.7 (d,  $J = 45.7$  Hz), 113.6, 113.5, 101.6, 101.3, 94.8, 88.2, 87.8, 87.6, 87.5, 84.3, 84.3, 76.4, 75.7, 73.7, 73.6, 73.0, 72.1, 72.0, 71.1, 71.0, 69.3, 69.3, 63.7, 63.2, 59.3, 59.2, 57.8, 57.6, 55.4, 43.7, 43.6, 43.2, 43.1, 28.5, 28.4, 26.0, 25.9, 25.0, 24.9, 24.8, 20.8, 20.7, 20.4, 20.3, 18.3, 18.2, 16.5, 16.5, -4.40, -4.54, -4.63, -4.67.

$^{19}\text{F}$  NMR (376 MHz,  $\text{CDCl}_3$ )  $\delta$  -65.3.

$^{31}\text{P}$  NMR (122 MHz,  $\text{CDCl}_3$ )  $\delta$  151.1, 149.2.

ESI $^+$ -HRMS calculated for  $\text{C}_{59}\text{H}_{72}\text{F}_3\text{N}_6\text{O}_{10}\text{PSi}$  ( $[\text{M}+\text{H}]^+$ ): 1141.4842, found: 1141.4872.

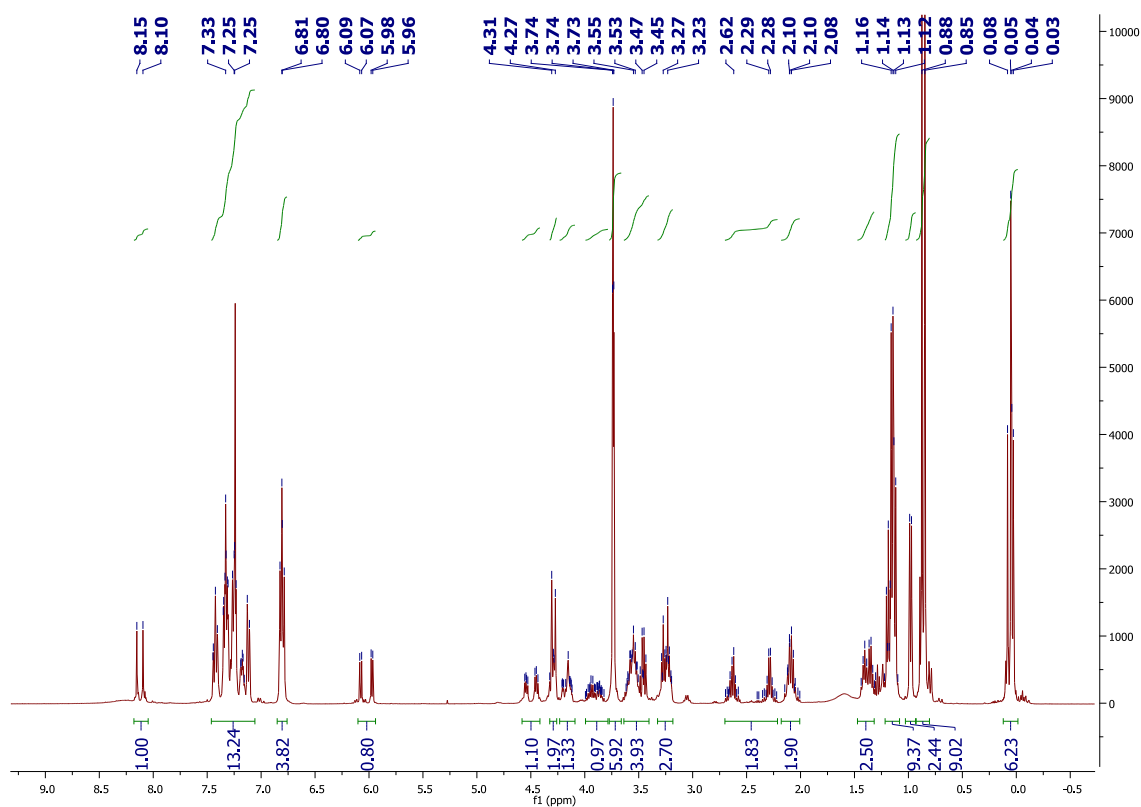

**Figure S32.**  $^1\text{H}$  NMR of  $\text{U}^{\text{Dz}}$ .

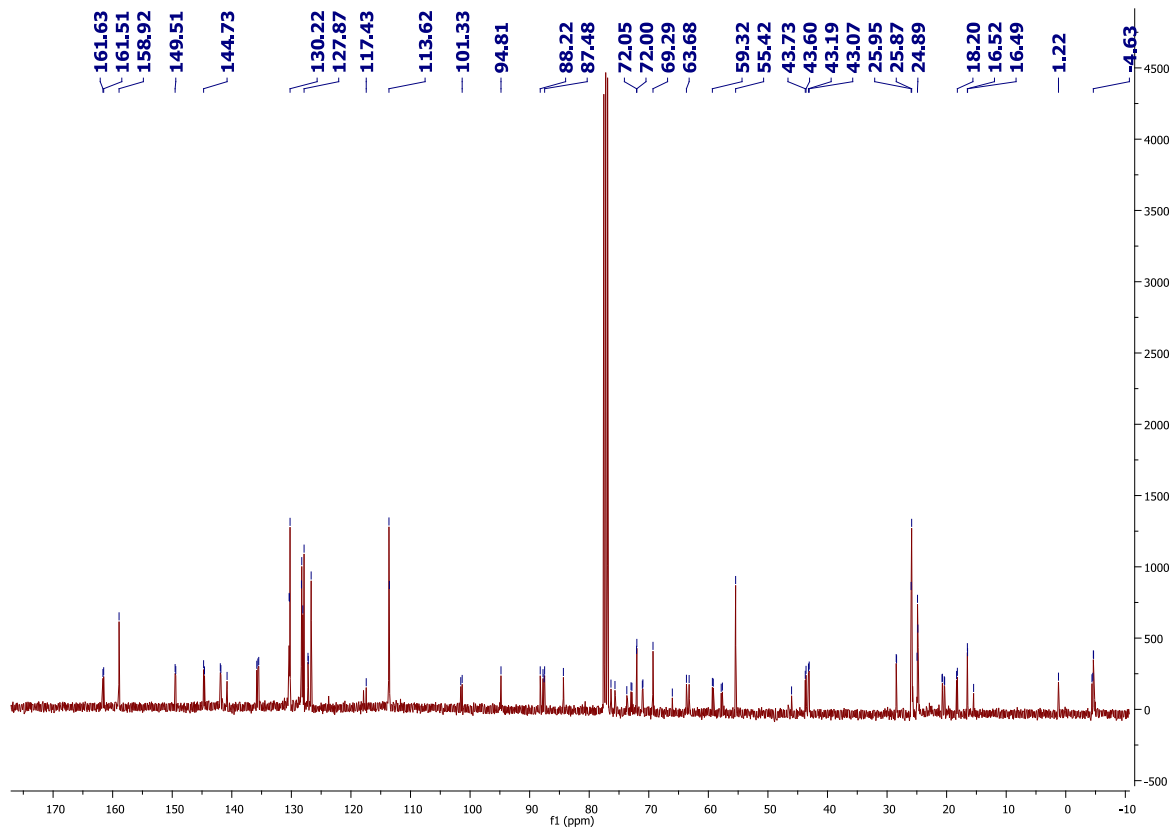

**Figure S33.**  $^{13}\text{C}$  NMR of  $\text{U}^{\text{Dz}}$ .

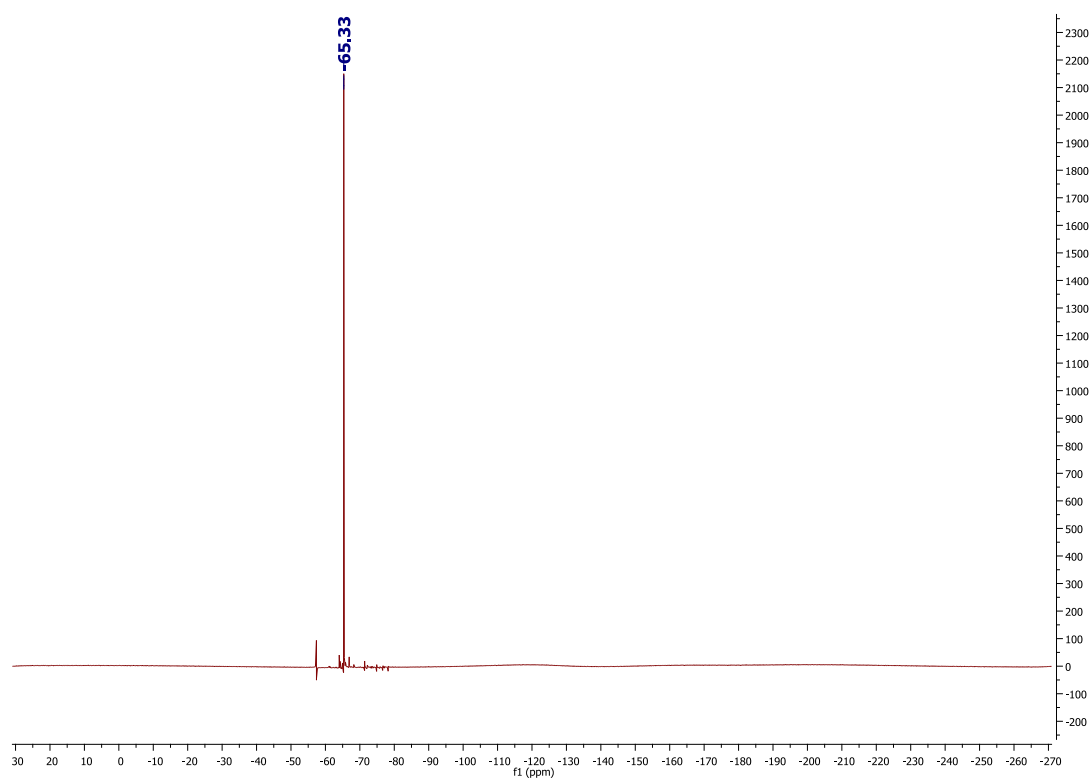

**Figure S34.**  $^{19}\text{F}$  NMR of  $\text{U}^{\text{Dz}}$ .

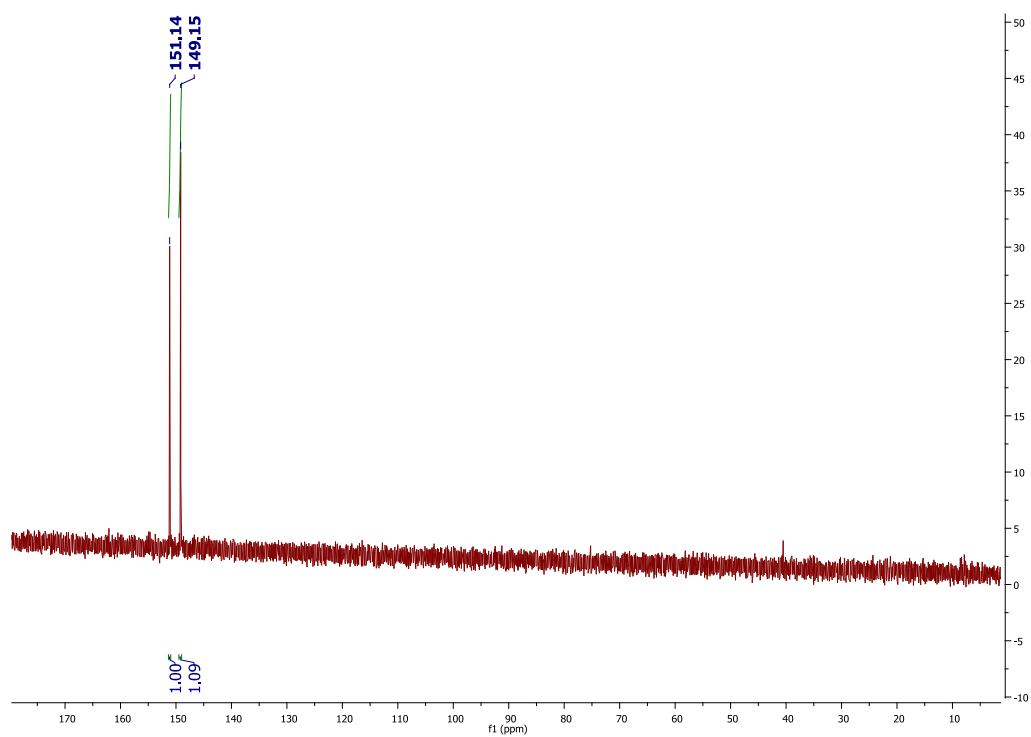

**Figure S35.**  $^{31}\text{P}$  NMR of  $\text{U}^{\text{Dz}}$ .

**Bis-2',3'-O-(acetyl)-5'-O-(4,4'-dimethoxytrityl)-5-(pent-1''-yn-5''-oxy-(methyl-phenyl-10''-(trifluoromethyl)-3*H*-diazirin)-1''-yl)-uridine (6)**

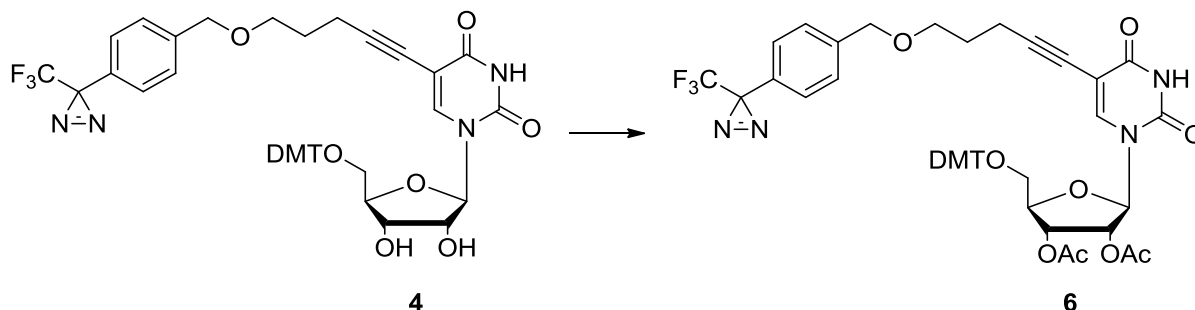

To a stirring solution of Compound **4** (400 mg, 0.48 mmol) at 0°C in dry pyridine (10 mL) was added DMAP (6 mg, 0.05 mmol) and Ac<sub>2</sub>O (0.14 mL, 1.45 mmol). The reaction mixture was allowed to warm to room temperature and then stirred for 2 hours. The reaction mixture was quenched with sat. NaHCO<sub>3</sub> solution (10 mL) and then diluted with CH<sub>2</sub>Cl<sub>2</sub> (100 mL), washed with further sat. NaHCO<sub>3</sub> solution (2x 10 mL), brine (10 mL). The organic layer was dried over MgSO<sub>4</sub>, filtered and reduced to dryness *in vacuo*. The residue was dissolved in CH<sub>2</sub>Cl<sub>2</sub> and purified by column chromatography (0-2% MeOH in CH<sub>2</sub>Cl<sub>2</sub>), to yield 315 mg (71%) of compound **6** as a pale orange foam.

Analytical data for compound **6**

TLC (CH<sub>2</sub>Cl<sub>2</sub>/MeOH 96:4) *R<sub>f</sub>* = 0.62

<sup>1</sup>H NMR (300 MHz, CDCl<sub>3</sub>) δ 7.92 (s, 1H, H<sub>6</sub>), 7.49 – 7.06 (m, 13H, H-arom.), 6.82 (dd, *J* = 8.8, 1.2 Hz, 4H, H-arom.), 6.23 (d, *J* = 7.2 Hz, 1H, H<sub>1'</sub>), 5.69 – 5.61 (m, 1H, H<sub>2'</sub>), 5.53 (dd, *J* = 5.4, 2.1 Hz, 1H, H<sub>3'</sub>), 4.35 (s, 2H, H<sub>6''</sub>), 4.19 (d, *J* = 2.1 Hz, 1H, H<sub>4'</sub>), 3.73 (d, *J* = 1.1 Hz, 6H, CH<sub>3</sub>-O-phenyl), 3.35 (dd, *J* = 14.1, 8.0 Hz, 4H, H<sub>5'</sub> and H<sub>5''</sub>), 2.19 (t, *J* = 7.2 Hz, 2H, H<sub>3''</sub>), 2.10, 2.08 (2s, 6H, CH<sub>3</sub>CO), 1.62 – 1.44 (m, 2H, H<sub>4''</sub>).

<sup>13</sup>C NMR (101 MHz, CDCl<sub>3</sub>) δ 170.0, 169.9, 161.9, 158.9, 149.9, 144.3, 141.1, 140.7, 135.5, 135.3, 130.2, 130.2, 128.3, 128.2, 128.1, 127.9, 127.2, 126.6, 122.3 (d, *J* = 274.7 Hz), 113.6, 102.2, 95.0, 87.8, 85.4, 82.7, 73.1, 72.1, 71.7, 70.9, 69.2, 63.1, 55.4, 28.5, 20.8, 20.6, 16.5.

<sup>19</sup>F NMR (376 MHz, CDCl<sub>3</sub>) δ -65.3.

ESI<sup>+</sup>-HRMS calculated for C<sub>34</sub>H<sub>33</sub>IN<sub>2</sub>O<sub>10</sub> ([M+H]<sup>+</sup>): 911.3110, found: 911.3095.

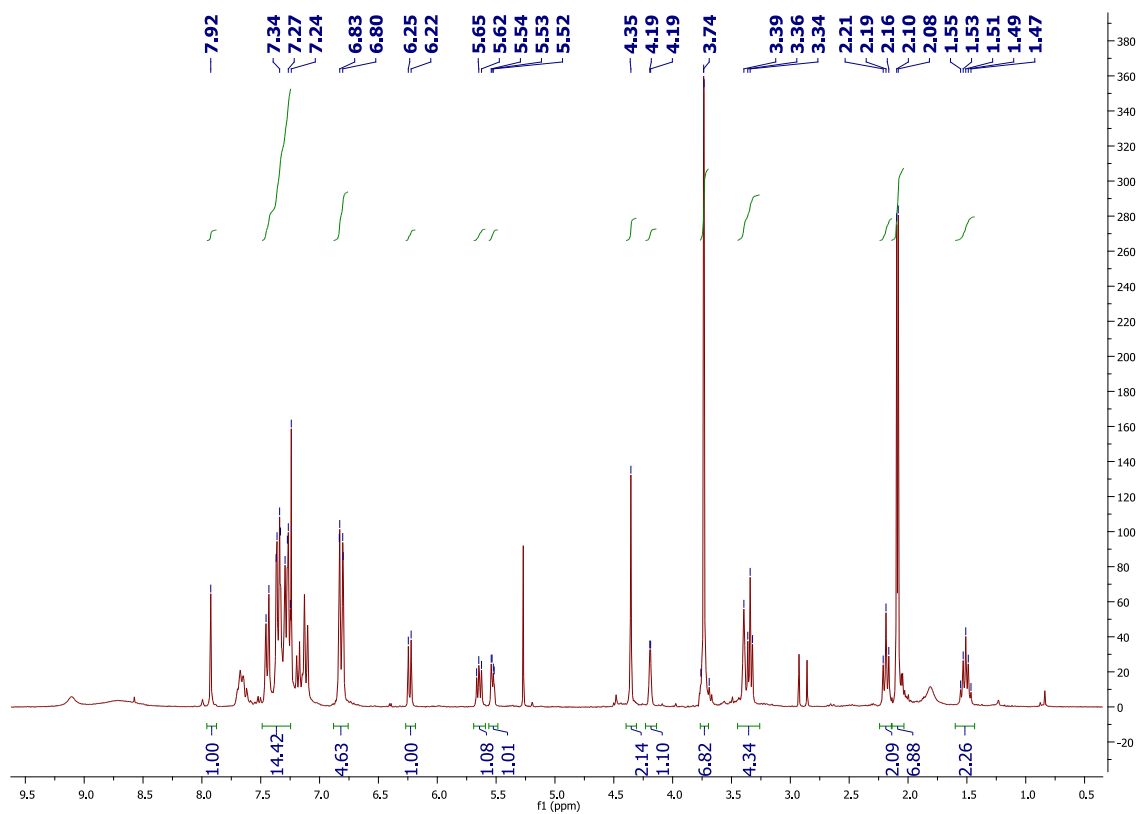

**Figure S36.** <sup>1</sup>H NMR of compound **6**.

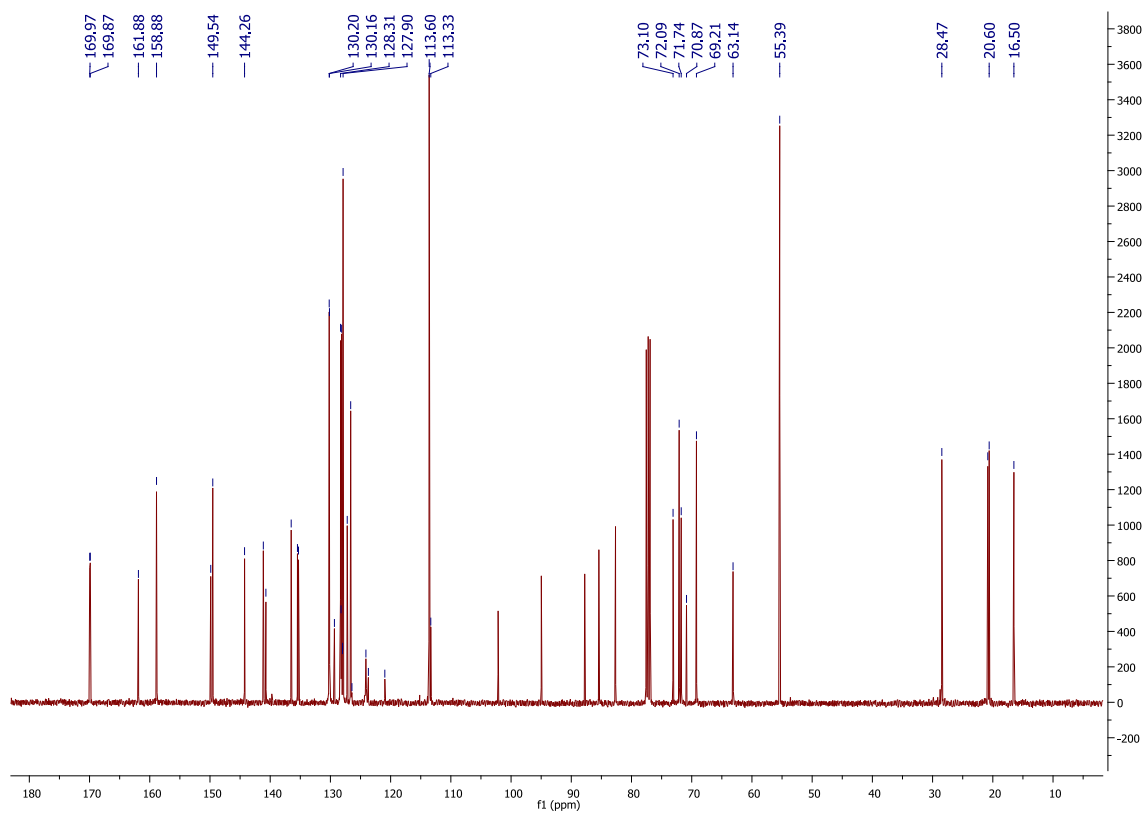

**Figure S37.** <sup>13</sup>C NMR of compound **6**.

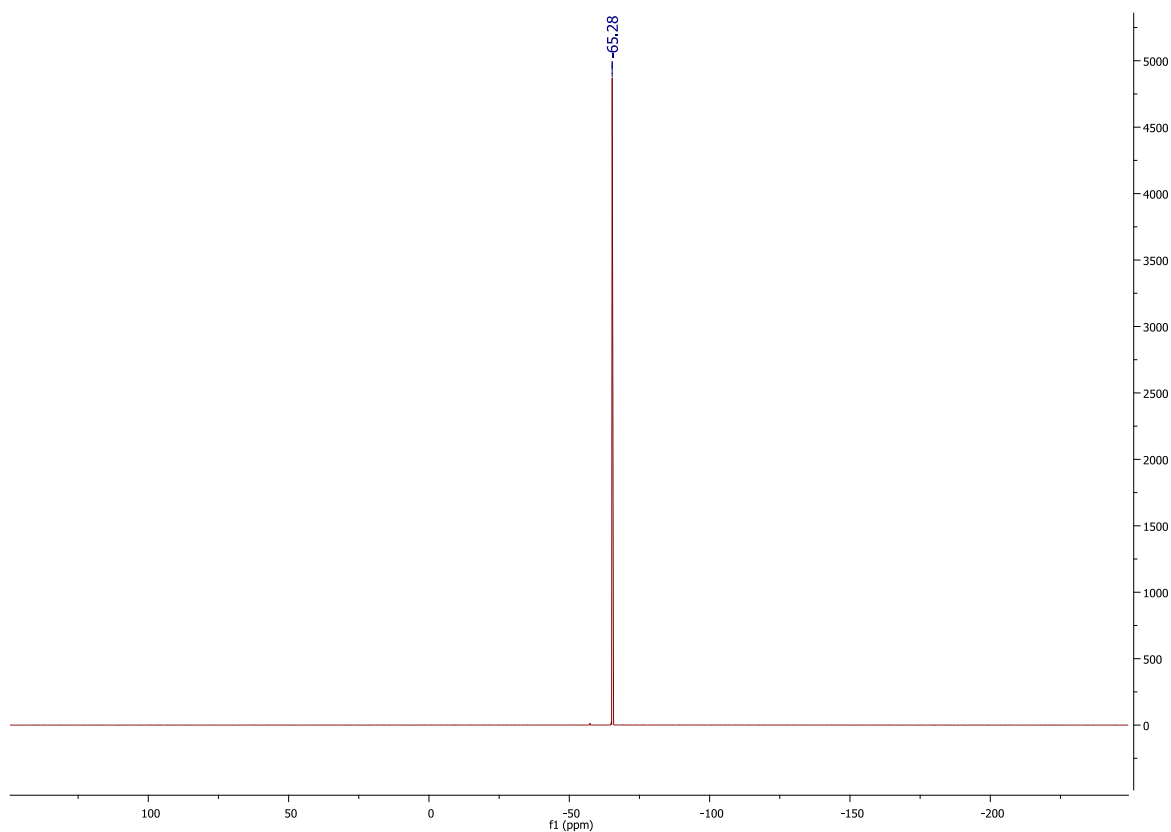

**Figure S38.**  $^{19}\text{F}$  NMR of compound **6**.

***Bis-2',3'-O-(acetyl)-5-(pent-1''-yn-5''-oxy-(methyl-phenyl-10''-(trifluoromethyl)-3H-diazirin)-1''-yl)-uridine (7)***

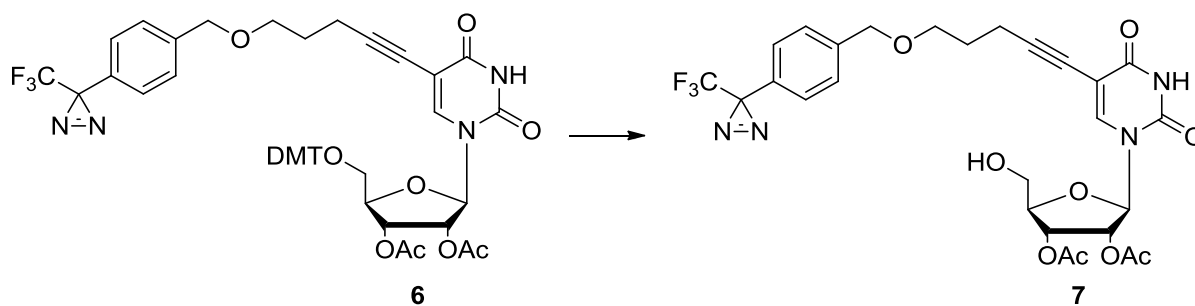

To a stirring solution of Compound **7** (315 mg, 0.35 mmol) in  $\text{CH}_2\text{Cl}_2$  (10 mL) at  $0^\circ\text{C}$  was added dichloroacetic acid (1%, 0.1 mL) and stirred for 1.5 hours. TLC analysis showed the presence of remaining starting material (~50%), so further dichloroacetic acid (0.1 mL) was added at  $0^\circ\text{C}$ . The reaction mixture was then stirred for 30 minutes at  $0^\circ\text{C}$ . The reaction mixture was quenched with MeOH (10 mL) and reduced to dryness *in vacuo*. The residue was dissolved in  $\text{CH}_2\text{Cl}_2$  (100 mL), washed with distilled  $\text{H}_2\text{O}$  (10 mL), brine (10 mL), dried

over MgSO<sub>4</sub>, filtered and reduced to dryness *in vacuo*. The residue was dissolved in CH<sub>2</sub>Cl<sub>2</sub> and purified by column chromatography (1-2% MeOH in CH<sub>2</sub>Cl<sub>2</sub>) to yield 101 mg (48%) of compound **7** as a colorless foam.

Analytical data for compound **7**

TLC (CH<sub>2</sub>Cl<sub>2</sub>/MeOH 98:2) *R<sub>f</sub>* = 0.26

<sup>1</sup>H NMR (300 MHz, MeOD) δ 8.24 (s, 1H, H6), 7.45 (d, *J* = 8.5 Hz, 2H, H-arom.), 7.22 (d, *J* = 8.0 Hz, 2H, H-arom.), 6.10 (d, *J* = 5.6 Hz, 1H, H1'), 5.49 (s, 1H, H2'), 5.46 – 5.42 (m, 2H, H3' and H4'), 4.56 (s, 2H, H6''), 4.23 (d, *J* = 2.6 Hz, 1H, 5'OH), 3.80 (m, 2H, H5'), 3.63 (t, *J* = 6.1 Hz, 2H, H5''), 2.51 (t, *J* = 7.0 Hz, 2H, H3''), 2.12, 2.05 (2s, 6H, CH<sub>3</sub>CO), 1.86 (m, 2H, H4'').

<sup>13</sup>C NMR (101 MHz, MeOD) δ 171.7, 171.5, 164.4, 151.6, 144.1, 142.6, 129.3, 129.1, 127.7, 127.7, 123.8 (d, *J* = 273.9 Hz), 102.1, 95.0, 88.3, 85.3, 75.0, 73.1, 72.9, 72.9, 70.2, 62.3, 29.8, 20.7, 20.4, 17.1.

<sup>19</sup>F NMR (376 MHz, MeOD) δ -67.0.

ESI<sup>+</sup>-HRMS calculated for C<sub>27</sub>H<sub>27</sub>F<sub>3</sub>N<sub>4</sub>O<sub>9</sub> ([M+H]<sup>+</sup>): 609.1803, found: 609.1788.

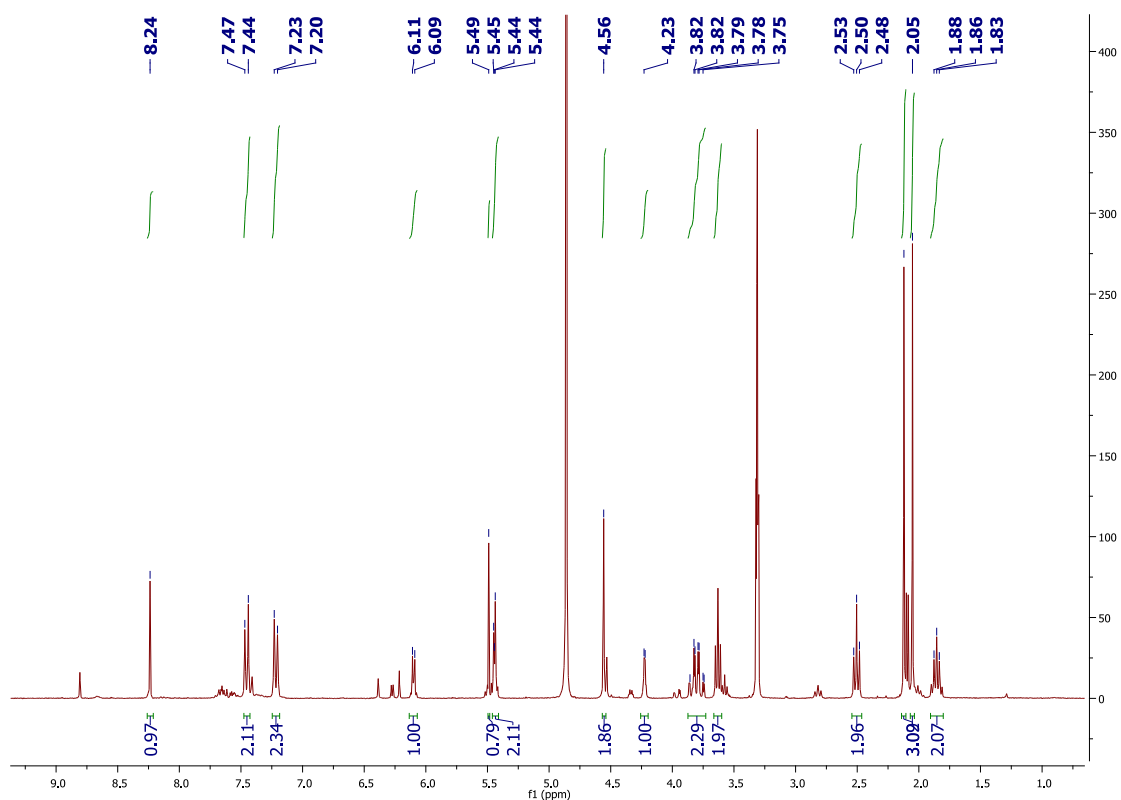

**Figure S39.** <sup>1</sup>H NMR of compound **7**.

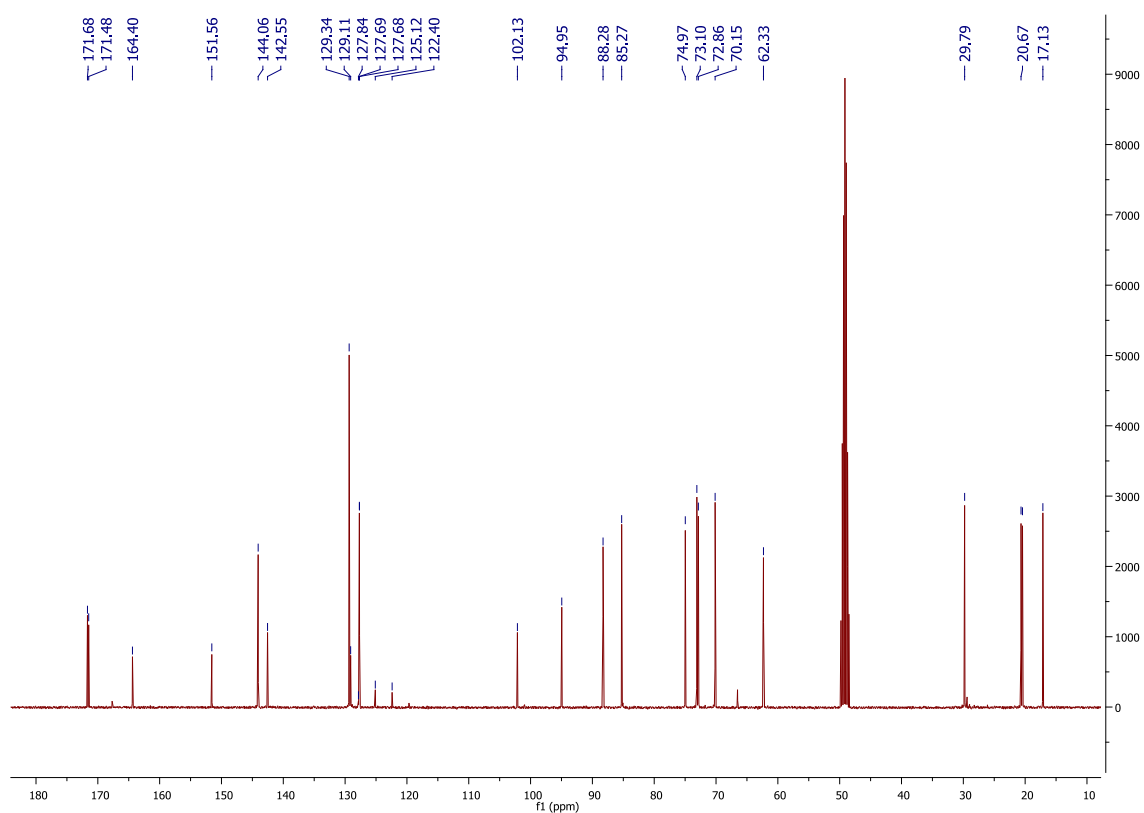

**Figure S40.** <sup>13</sup>C NMR of compound **7**.



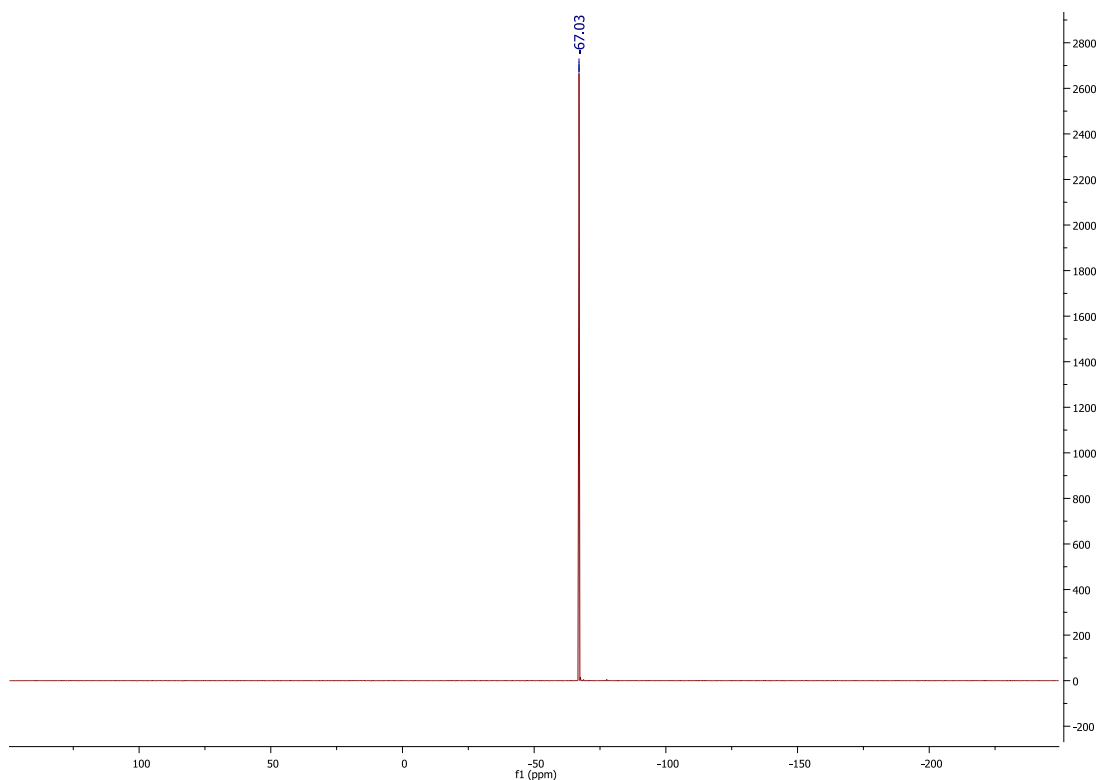

**Figure S41.**  $^{19}\text{F}$  NMR of compound **7**.

**5-(pent-1''-yn-5''-oxy-(methyl-phenyl-10''-(trifluoromethyl)-3*H*-diazirin)-1''-yl)-uridine triphosphate ( $\text{U}^{\text{Dz}}\text{TP}$ )**

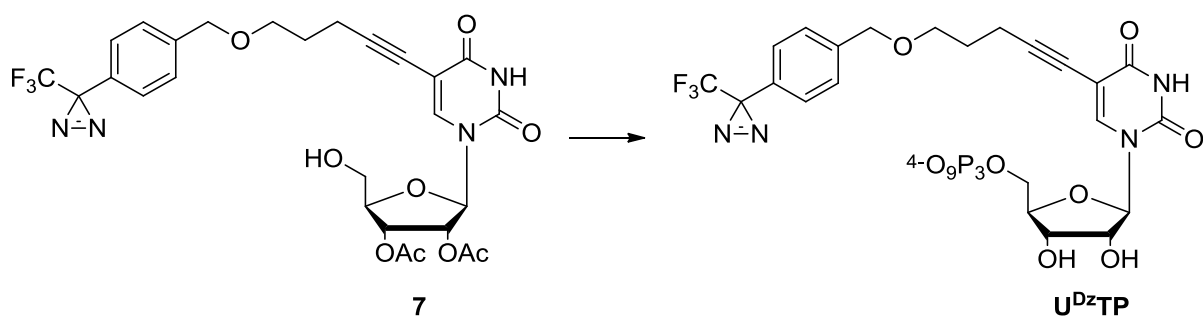

Compound **7** was co-evaporated with dry pyridine (3x 1 mL) and dried overnight *in vacuo*. Tributylammonium pyrophosphate was dried overnight *in vacuo*. Flasks were removed under Ar. Immediately before use, the hydrolysed outer layer of 2-chloro-1,3,2-benzodioxaphosphorin-4-one was removed.

To a stirring solution of compound **30** (48 mg, 0.08 mmol) in dry pyridine (0.2 mL) and dry 1,4-dioxane (0.4 mL) under Ar was added 2-chloro-1,3,2-benzodioxaphosphorin-4-one (18 mg, 0.09 mmol) and stirred at room temperature for 45 minutes.

Tributylammonium pyrophosphate (56 mg, 0.10 mmol) was dissolved in dry DMF (170  $\mu$ L) and distilled tri-*n*-butylamine (60  $\mu$ L) and added to the reaction mixture, which was stirred for 40 minutes at room temperature.

Iodine (32 mg, 0.13 mmol) was dissolved in dry pyridine (1 mL) and ultrapure water (20  $\mu$ L) and added to the reaction mixture and stirred for 30 minutes.

A 10% solution of Na<sub>2</sub>SO<sub>3</sub> in H<sub>2</sub>O was then added and the reaction mixture was stirred until colourless. The reaction mixture was then evaporated *in vacuo* (and keeping the temperature below 35°C). The residue was dissolved in ultra-pure water (5 mL) and left to stand for 30 minutes.

Aqueous ammonia (25%, 10 mL) was added and the reaction mixture was stirred at room temperature for 2 hours. Ammonium hydroxide was removed *in vacuo*. The residue was dissolved in D<sub>2</sub>O (2 mL) and a <sup>31</sup>P NMR spectrum of the crude was measured. The sample was split in two, and 2% NaClO<sub>4</sub> in acetone (11 mL) added to each half. The resulting mixture was centrifuged for 25 minutes (5000 rpm). The supernatant was removed and this precipitation procedure was repeated. The residue in each sample was dissolved in ultrapure water (2 mL) and combined. The combined 4 mL were then purified by RP-HPLC (0-20% B in 20 minutes then 20-80% B in 30 minutes using the TEAB buffer system (eluent A: 50 mM TEAB, pH 7.7; eluent B: 50 mM TEAB in CH<sub>3</sub>CN–H<sub>2</sub>O 1 : 1)) with UV monitoring at 270, 280 and 290 nm. The appropriate fractions were freeze-dried and coevaporated several times with ultrapure water (10 mL). Application of this procedure yielded 18 mg (21%, tris-triethylammonium salt) of triphosphate **U<sup>Dz</sup>TP** as a colorless foam.

Analytical data for **U<sup>Dz</sup>TP**

$R_t$  = 43.5 min.

<sup>1</sup>H NMR (300 MHz, D<sub>2</sub>O)  $\delta$  7.78 (s, 1H, H6), 7.41 (d,  $J$  = 8.2 Hz, 2H, H-arom.), 7.11 (d,  $J$  = 8.0 Hz, 2H, H-arom.), 5.90 (d,  $J$  = 5.2 Hz, 1H, H1'), 4.53 (d,  $J$  = 5.9 Hz, 2H, H6''), 4.35 – 4.11 (m, 5H, H2', H3', H4' and H5'), 3.61 (dd,  $J$  = 11.2, 5.2 Hz, 2H, H5''), 2.41 (dd,  $J$  = 12.1, 5.6 Hz, 2H, H3''), 1.76 (dd,  $J$  = 12.1, 6.0 Hz, 2H, H4'').

$^{31}\text{P}$  NMR (122 MHz,  $\text{D}_2\text{O}$ )  $\delta$  -10.74 (m,  $\text{P}_\gamma$ ), -11.56 (d,  $J = 18.3$  Hz,  $\text{P}_\alpha$ ), -23.12 (m,  $\text{P}_\beta$ ).

ESIHRMS calculated for  $\text{C}_{23}\text{H}_{24}\text{F}_3\text{N}_4\text{O}_{16}\text{P}_3$  ( $[\text{M}+\text{H}]^+$ ): 763.0436, found: 763.0420.

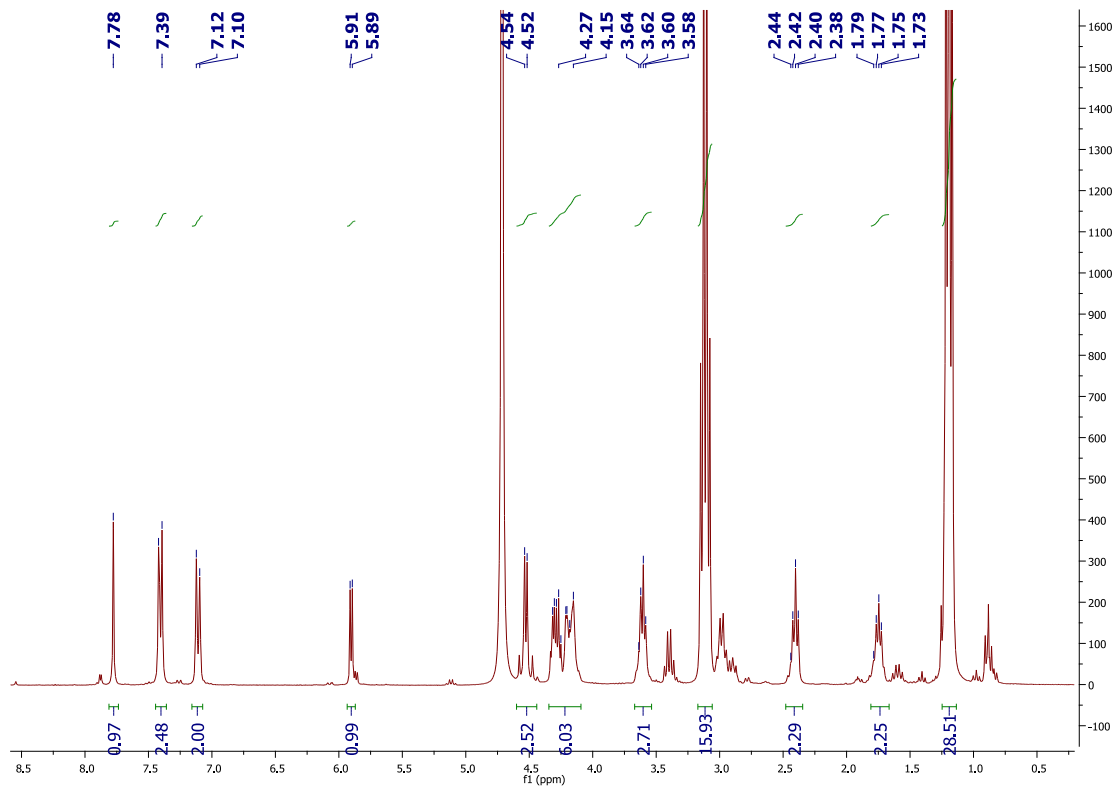

**Figure S42.**  $^1\text{H}$  NMR of  $\text{U}^{\text{Dz}}\text{TP}$ .

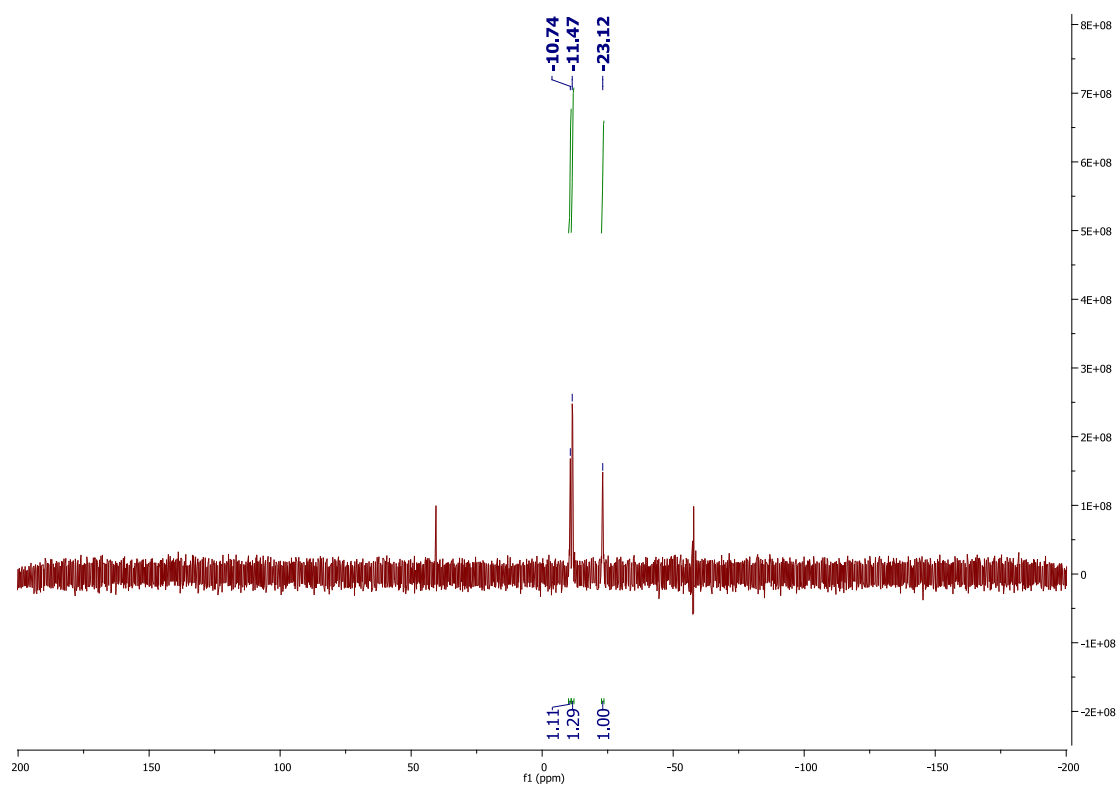

**Figure S43.**  $^{31}\text{P}$  NMR of  $\text{U}^{\text{Dz}}\text{TP}$ .

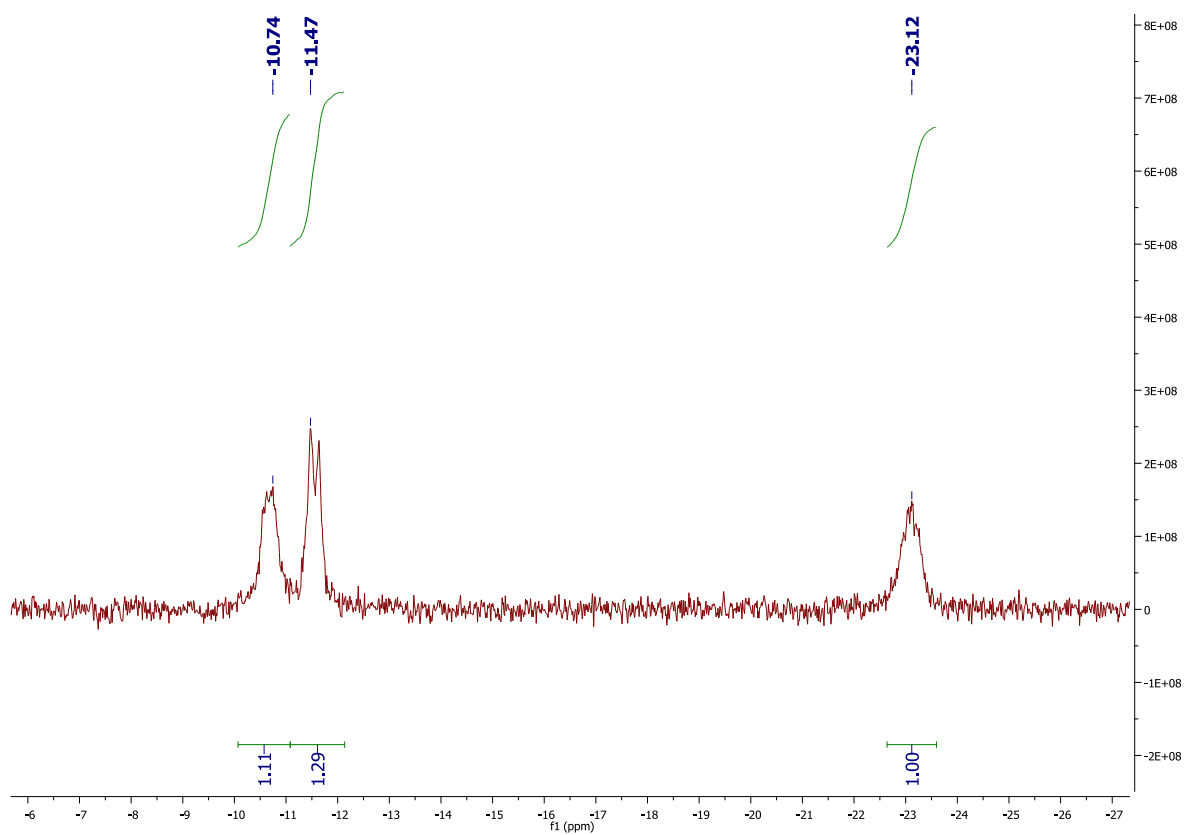

**Figure S44.** Zoom of  $^{31}\text{P}$  NMR spectrum of  $\text{U}^{\text{Dz}}\text{TP}$ .

### 3. Oligonucleotide synthesis

Syntheses of oligonucleotides were performed on the 1.3  $\mu\text{mol}$  scale of a LKB Gene Assembler Plus (*Pharmacia*) DNA synthesizer using standard solid-phase phosphoramidite chemistry. Natural RNA nucleoside phosphoramidites were purchased from AZCO Biotech or SAFC.

Oligomers were synthesized using the manufacturer's protocols on controlled pore-glass (CPG) preloaded with DMTr- and base-protected natural nucleoside solid supports (Glen Research). Natural and modified phosphoramidites were both prepared as a 0.1 M solution in  $\text{CH}_3\text{CN}$ . Strictly anhydrous  $\text{CH}_3\text{CN}$  was used and the phosphoramidite solutions were dried on 4 Å activated molecular sieves prior to use. An extended coupling time (12 min) for all phosphoramidite solutions was necessary to achieve acceptable average coupling efficiencies. Coupling yields were calculated from the absorbance at 436 nm of the DMTr<sup>+</sup> cation (trityl assay). Manual detritylation of monomer  $\text{U}^{\text{Dz}}$  was required to ensure complete deprotection. All oligonucleotides were cleaved and deprotected using standard protocols. Crude oligomers were purified by ion-exchange HPLC. As mobile phases, the following buffers were prepared: (A) 25 mM in ultrapure  $\text{H}_2\text{O}$ , pH 8.0; (B) 25 mM Trizma, 1.25 M NaCl in ultrapure  $\text{H}_2\text{O}$ , pH 8.0. Linear gradients of B in A were used (typically 20–80% B over 30 min), with a 1 mL/min flow rate and detection at 260 nm. Oligonucleotides ON1-4 (Table S1) had a retention time of ~14 min. Purified oligonucleotides were desalted over Sep-Pak cartridges, quantified at 260 nm with a Nanodrop spectrophotometer (Thermo Scientific), and analyzed by ESI-mass spectrometry (see Table S1). Solutions of oligonucleotides in  $\text{H}_2\text{O}$  were then stored at  $-18^\circ\text{C}$ .

**Table S1.**<sup>a</sup> Sequence and analytical data of sequences ON1-4.

|     | Sequence (5'→3')                        | $m/z_{\text{calc.}}$ | $m/z_{\text{found}}$ |
|-----|-----------------------------------------|----------------------|----------------------|
| ON1 | Biotin-CCUAUGUCACUGAAACUAUCC            | 6979.04              | 6982.00              |
| ON2 | Biotin-CCUAUGUCACUGAAAC $\text{X}$ AUCC | 7259.13              | 7261.10              |
| ON3 | Biotin-CCUAUGUCAC $\text{X}$ GAAACUAUCC | 7259.13              | 7261.09              |
| ON4 | Biotin-CC $\text{X}$ AUGUCACUGAAACUAUCC | 7259.13              | 7260.08              |

<sup>a</sup>  $\text{X}$  indicate the position of the  $\text{U}^{\text{Dz}}$  modifications.

#### **4. Crosslinking and transcription assays:**

##### **i) List of Buffers**

**B1.** Irradiation buffer 50 mM Tris-HCl, 10 mM MgCl<sub>2</sub>, 10 mM DTT, (pH 7.8).

**B2.** 5x transcription buffer: 200 mM Tris-HCl, 50 mM NaCl, 50 mM DTT, 30 mM MgCl<sub>2</sub>, 10 mM spermidine, 0.25% Tween, (pH 7.9).

**B3.** Loading buffer: 70% formamide, 50 mM EDTA, bromophenol blue and xylene cyanol FF (each 0.1 %).

##### **ii) Oligonucleotides:**

**Table S2.** Sequence composition of oligonucleotides.

| Oligonucleotide | Sequence (shown 5' to 3')                                                    |
|-----------------|------------------------------------------------------------------------------|
| ON1             | Biotin-r(CCUAUGUCACUGAAACUAUCC)                                              |
| ON2             | Biotin-r(CCUAUGUCACUGAAACU <sup>Dz</sup> AUCC)                               |
| ON3             | Biotin-r(CCUAUGUCACU <sup>Dz</sup> GAAACUAUCC)                               |
| ON4             | Biotin-r(CCU <sup>Dz</sup> AUGUCACUGAAACUAUCC)                               |
| ON5             | r(GGAUAGUUUCAGUGACAUAGG)                                                     |
| ON6             | d(GGATAGTTTCAGTGACATAGG)                                                     |
| T1              | d(TAATACGACTCACTATAGGGAGACCATGCACAACCGGAA<br>ACCC)                           |
| T1'             | d(GGGTTTCCGGTTGTGCATGGTCTCCCTATAGTGAGTCGTA<br>TTA)                           |
| T2              | d(TAATACGACTCACTATAGGGAGACCAAGCACAACCGGTT<br>TCCC)                           |
| T2'             | d(GGGAAACCGGTTGTGCTTGGTCTCCCTATAGTGAGTCGTA<br>TTA)                           |
| T3              | d(TAATACGAGTCACTATAGGGAGACCATGCACTACCGGTA<br>ACCC)                           |
| T3'             | d(GGGTTACCGGTAGTGCATGGTCTCCCTATAGTGAGTCGTA<br>TTA)                           |
| T4              | d(TAATACGACTCACTATAGGGAGACCATGCACAACCGGAAAC<br>CCGGGAGACCATGCACTACCGGTAACCC) |
| T4'             | d(GGGTTACCGGTAGTGCATGGTCTCCCGGGTTTCCGGTTGTGC<br>ATGGTCTCCCTATAGTGAGTCGTATTA) |

### iii) General Procedure for the Protein Crosslinking Assay

Single-stranded binding protein (SSB) (1 µg) and oligonucleotide (3 pmoles of radiolabelled or 50 pmoles of fluorescently labelled) were incubated in **B1** in a total volume of 15 µL in a PCR vial at room temperature for at least 30 minutes prior to irradiation. The sample was irradiated at 375 nm for 30 minutes. **B3** (15 µL) was then added and heated to 95 °C for 5 minutes. The resulting RNA-protein complexes were then resolved by 10% SDS-PAGE at

10W for 2 hours. Radiolabelled samples were exposed on the imaging plate at -18 °C overnight before visualising by phosphorimaging.

#### iv) **General Procedure for Post-Cross-linking RNA Labelling**

The irradiated samples were EtOH precipitated before being re-suspended in ultrapure H<sub>2</sub>O (100 µL) and purified by Millipore spin column (30 kDa cut off), washing with **B1**. The resulting solution was EtOH precipitated again, and re-suspended and incubated in **B1**, T4 RNA ligase I (20 units), ATP (1mM) and 1µM [<sup>32</sup>P]pCp with the addition of ultrapure H<sub>2</sub>O to a total volume of 30 µL at 4 °C overnight. **B3** (30 µL) was added and heated to 95 °C for 5 minutes. The samples were then resolved on 10% SDS PAGE.

#### v) **General Procedure for T7 RNA Transcription**

Oligonucleotides used for transcription assays were purchased from Microsynth (Table S2). Oligonucleotides shorter than 50mer were purified by phenol/chloroform extraction followed by EtOH precipitation prior to use. 62mer oligonucleotides T4 and T4' were purified by gel (10% PAGE) before EtOH precipitation and G<sub>10</sub> Sephadex spin column before use.

All transcription reactions contained: dsDNA templates (40 pmoles), natural or modified NTPs (0.4 mM each), T7 RNA polymerase (100 units), RNasin<sup>®</sup> (20 units), α-<sup>32</sup>P-ATP (10µCi), TIPP (0.6 units) in **B2** with ultrapure H<sub>2</sub>O added to reach a total volume of 20 µL.

Oligonucleotides and **B2** were placed in an eppendorf vial and annealed by slow cooling from 90°C to room temperature over one hour. A cocktail containing the appropriate NTPs, H<sub>2</sub>O and RNasin<sup>®</sup> was then added to the annealed primer-template duplex. α-<sup>32</sup>P-ATP was added before cooling to 0°C. TIPP and T7 RNA polymerase were then added in turn and the reaction mixture was incubated at 37°C for the required reaction time. The reaction was quenched with **B3** (20 µL), heated to 95°C for 20 minutes and resolved on 15-20% denaturing PAGE.



## 5. Additional Gels:

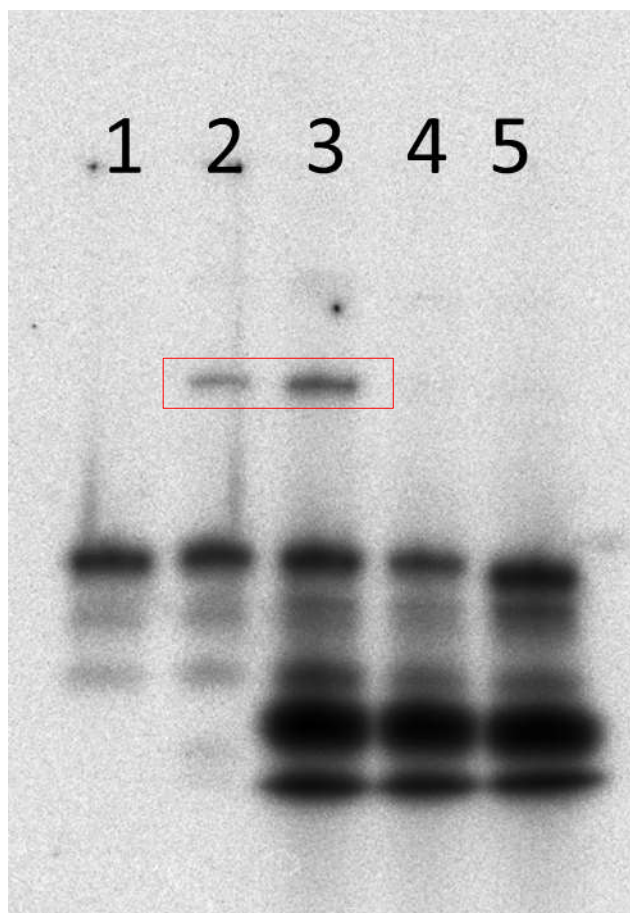

**Figure S45.** Radioautograph of 10% SDS PAGE of cross-linking of ON4 and SSB with pre- and post-labelling and controls. Lane 1: Pre-labelled ON4. Lane 2: Pre-labelled ON4 + SSB, irradiated. Lane 3: Post-labelled ON4 + SSB, irradiated. Lane 4: Post-labelled ON4 + SSB, non-irradiated. Lane 5: Post-labelled ON1 + SSB, irradiated.

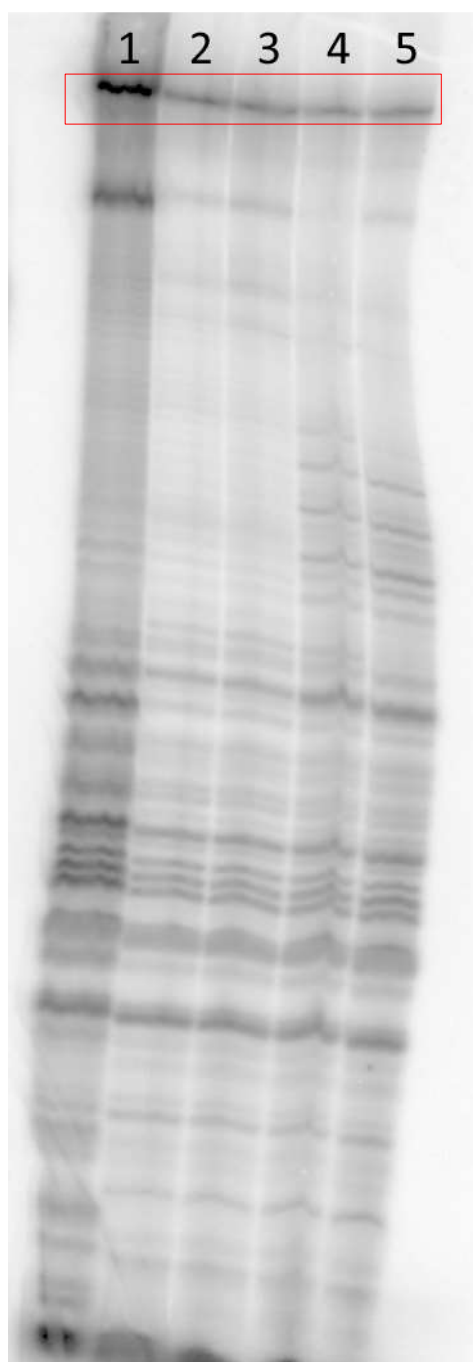

**Figure S46.** Radioautograph of 20% PAGE of transcription assays with the T4/T4' system with a reaction time of 24-75 hours. Lane 1: Natural control, reaction time 24 hours. Lane 2:  $\text{U}^{\text{Dz}}\text{TP}$ , reaction time 26 hours. Lane 3:  $\text{U}^{\text{Dz}}\text{TP}$ , reaction time 44 hours. Lane 4:  $\text{U}^{\text{Dz}}\text{TP}$ , reaction time 68 hours. Lane 5:  $\text{U}^{\text{Dz}}\text{TP}$ , reaction time 75 hours. Red highlights full-length transcript. Conditions: 40 pmol of dsDNA template T4/T4', 0.4 mM of natural NTPs, 0.6 mM NTP 31, 100 units of T7 RNA polymerase, 0.6 units of PPIase, 0.5  $\mu\text{L}$  RNasin, and 10  $\mu\text{Ci}$  of  $\alpha\text{-}^{32}\text{P}\text{-ATP}$  in the transcription optimised buffer composed of 40 mM Tris-HCl (pH 7.9), 6 mM  $\text{MgCl}_2$ , 10 mM NaCl, 2 mM spermidine, 10 mM DTT and 0.05% of the polysorbate detergent Tween. Reactions were incubated at 37°C 24-75 hours. Maximum yield of modified RNA compared to natural control was 37%.

## 6. Cited references:

1. Wahba, A. S.; Esmaeili, A.; Damha, M. J.; Hudson, R. H. E. *Nucleic Acids Res.* **2010**, 38, 1048.
2. Robson, J. H.; Reinhart, J. *J. Am. Chem. Soc.* **1955**, 77, 498.
3. Fishwick, C. W. G.; Sanderson, J. M.; Findlay, J. B. C. *Tetrahedron Lett.* **1994**, 35, 4611.
4. Smith, D. P.; Anderson, J.; Plante, J.; Ashcroft, A. E.; Radford, S. E.; Wilson, A. J.; Parker, M. J. *Chem. Commun.* **2008**, 5728.
